# Supplementary material
Source: PubMed Central journal article supplement (PMC3845668)
Supplement: NIHMS525969-supplement-1.pdf [file NIHMS525969-supplement-1.pdf]

## **Supplemental Digital Content for**

### **Bending the Cost Curve? Results from a Comprehensive Primary Care Payment Pilot**

#### **Appendix A. Primary Care Practitioner (PCP) Assignment Algorithms: Massachusetts Health Quality Project (MHQP) vs. Capital District Physicians' Health Plan (CDPHP)**

#### **Appendix B. Further Results from the Difference-in-Difference Analysis**

#### **Appendix C. Further Results from the Difference-in-Difference Analysis When Including Risk Scores in the Propensity Score Model**

**Appendix A. Primary Care Practitioner (PCP) Assignment Algorithms: Massachusetts Health Quality Project (MHQP) vs. Capital District Physicians' Health Plan (CDPHP)**

Massachusetts Health Quality Project's (MHQP) Primary Care Practitioner (PCP) Assignment Algorithm

Capital District Physicians' Health Plan's (CDPHP) Primary Care Practitioner (PCP) Assignment Algorithm

Table A-1: Ex Post Assignment of Patients to Primary Care Practitioners (PCP)

## **Massachusetts Health Quality Project's (MHQP) Primary Care Practioner (PCP)**

### **Assignment Algorithm**

We evaluate the patient assignment algorithm used by the Massachusetts Health Quality Project (MHQP), which groups primary-care-related Current Procedural Terminology (CPT) codes into two categories: well visit/physical exams and other Evaluation and Management (E&M) codes. The algorithm initially assigns a member only to a physician with a primary care specialty who has contracted with Capital District Physicians' Health Plan (CDPHP) to serve as their primary care practioner (PCP) only if the member had a well visit/physical exam in the last 18 months that was billed by this physician. If the member had a well visit/physical exam during this time frame with two or more such physicians, the member is assigned to the one with the most recent well visit/physical exam. Remaining members are assigned to the physician, with a non-primary care specialty and a contractual agreement to serve as a PCP, if the member had a well visit/physical exam in the last 18 months that was billed by this physician. If the member has a well visit/physical exam during this time frame with two or more specialists, the algorithm attributes the member's care to the specialist with the most recent well visit/physical exam. In our data there were some physicians whose specialty code could not be identified. In our modification of the MHQP algorithm we next repeat the above steps of the assignment methodology for these physicians. For the members with no well visit/physical exam the algorithm repeats the above steps but replaces well visit/physical exam codes with the remaining E&M codes.

After the initial steps, we allow members to be assigned to physicians who have not contracted with CDPHP to serve as a PCP using the same assignment strategy and codes as described previously. The members who remain unassigned are then attributed to the primary

care physician with whom the member had a visit in the last 18 months, even though none of the visits to that physician were either well visits or E&M codes. The algorithm next attributes remaining unassigned members to a well-defined group of specialists with whom the member had a visit in the last 18 months, even though none of the visits to that physician were either well visits or E&M codes. Finally, members who remain unassigned are attributed to other physicians or facilities they have visited, even if they did not have a well visit or E&M code visit. Only patients making no medical visits during the 18-month period remain unassigned to any provider.

Altogether, the MHQP algorithm assigned 296,457 patients in three years to 2,526 PCPs billing from 1,122 distinct practices located in the four-county study region. Note that the substantially larger number of PCPs and practices from the MHQP algorithm arises because physicians who have not contracted with CDPHP to serve as a PCP are ultimately allowed to be assigned as the patient's PCP, whereas the CDPHP assignment requires that a physician contract with the plan to be a PCP.

### **Capital District Physicians' Health Plan's (CDPHP) Primary Care Practitioner (PCP)**

#### **Assignment Algorithm**

To make base payments to participating PCMH practices and evaluate their performance, Capital District Physicians' Health Plan (CDPHP) developed an algorithm to assign patients to specific primary care practitioners (PCP). The algorithm even assigns those patients who are enrolled in plans (such as preferred provider organizations (PPO)) which do not require patients to choose their PCP. Using 24 months of evaluation and management (E&M) codes, the CDPHP algorithm only assigns members to a physician who has signed a contract with CDPHP that allows him to serve as a PCP; the specialty of the physician is not restricted to primary care. If

the member has at least one E&M code from any physician flagged as a PCP then the member is assigned to that practitioner. In the event that there are E&M codes from more than one practitioner the algorithm assigns the member to the practitioner from whom there are more codes in aggregate. Further, if the member has same number of E&M codes from more than one physician the member is assigned to the physician with whom he has more preventive codes. If there still exists a tie between two or more PCPs, patient assignment goes to the PCP visited most recently.

In the absence of any E&M codes in the last 24 months the member is assigned to the physician who is the member's 'chosen' PCP in the CDPHP records. If no such PCP exists, the algorithm assigns the member to the PCP who bills more dollars. If none of the above holds for a member the algorithm assigns him to the PCP with the most recent date-of-service given that the service is provided in an office setting and not in emergency department or urgent care setting. Altogether, the CDPHP algorithm assigned 265,313 patients in three years to 752 PCPs billing from 324 distinct practices located in the four county study region.

**Table A-1: Ex Post Assignment of Patients to Primary Care Practitioners (PCP)**

|                                    | Massachusetts Health Quality Project MHQP<br>Primary Care Practitioner (PCP) Assignment<br>Algorithm | Capital District Physicians' Health Plan (CDPHP) PCP Assignment<br>Algorithm |
|------------------------------------|------------------------------------------------------------------------------------------------------|------------------------------------------------------------------------------|
| Claims Used:                       | 18 months                                                                                            | 24 months                                                                    |
| Codes Used Initially:              | Well care visits                                                                                     | Evaluation and Management (E&M) codes including well care visits             |
| Codes Used Subsequently:           | Other E&M<br>Other visits                                                                            | Any other visit to an eligible provider                                      |
| Assigned to:                       | Physicians with primary care specialty                                                               | Physicians with CDPHP PCP contract                                           |
| Physician Specialty:               | *Other physicians with CDPHP PCP contract                                                            | Not restricted to primary care specialty                                     |
| Also:                              | All other physicians                                                                                 | Specialists only if CDPHP PCP contract                                       |
| Tiebreaker #1                      | Most recent well care visit                                                                          | Physician with more E&M codes                                                |
| Tiebreaker #2                      | Most recent E&M visit                                                                                | More preventive codes                                                        |
| Tiebreaker #3                      | Most office visits for any reason                                                                    | Most recent PCP visited                                                      |
| Tiebreaker #4                      | Most recent office visit for any reason                                                              | Member's 'chosen' PCP                                                        |
| Tiebreaker #5                      |                                                                                                      | Most spending on non E&M                                                     |
| Tiebreaker #6                      |                                                                                                      | Most recent any other office visit                                           |
| <i>Result:</i>                     | <i>2526 PCPs billing from 1122 practices</i>                                                         | <i>752 PCPs billing from 324 practices</i>                                   |
| Notes: *as modified for this paper |                                                                                                      |                                                                              |

## **Appendix B. Further Results from the Difference-in-Difference Analysis**

Figure B-1. Age Distribution in 2008 Using Massachusetts Health Quality Project (MHQP)

Primary Care Practitioner (PCP) Assignment, with Changing PCP Assignment, and Including Entry and Exit

Table B-1: Summary Statistics for Massachusetts Health Quality Project (MHQP) Primary Care Practitioner (PCP) Assignment, with Fixed 2008 PCP Assignment, and Excluding Entry and Exit

Table B-2: Summary Statistics for Massachusetts Health Quality Project (MHQP) Primary Care Practitioner (PCP) Assignment, with Fixed PCP Assignment, and Including Entry and Exit

Table B-3: Summary Statistics for Massachusetts Health Quality Project (MHQP) Primary Care Practitioner (PCP) Assignment, with Changing PCP Assignment, and Including Entry and Exit

Table B-4: Basic Difference-in-Difference Regressions Using Massachusetts Health Quality Project (MHQP) Primary Care Practitioner (PCP) Assignment

Table B-5: Difference-in-Difference Regressions Using Individual Fixed Effects and Massachusetts Health Quality Project (MHQP) Primary Care Practitioner (PCP) Assignment

Table B-6: Treatment Effect Sensitivity Analysis Using Massachusetts Health Quality Project (MHQP) Primary Care Practitioner (PCP) Assignment, with Fixed 2008 PCP Assignment, and Excluding Entry and Exit

Table B-7: Treatment Effect Sensitivity Analysis Using Massachusetts Health Quality Project  
(MHQP) Primary Care Practitioner (PCP) Assignment, with Fixed PCP Assignment,  
and Including Entry and Exit

Table B-8: Treatment Effect Sensitivity Analysis Using Massachusetts Health Quality Project  
(MHQP) Primary Care Practitioner (PCP) Assignment, with Changing PCP  
Assignment, and Including Entry and Exit

Table B-9: Treatment Effect Sensitivity Analysis Using Capital District Physicians' Health Plan  
(CDPHP) Primary Care Practitioner (PCP) Assignment, with Fixed 2008 PCP  
assignment, and Excluding Entry and Exit

Table B-10: Treatment Effect Sensitivity Analysis Using Capital District Physicians' Health Plan  
(CDPHP) Primary Care Practitioner (PCP) Assignment, with Fixed PCP  
Assignment, and Including Entry and Exit

Table B-11: Treatment Effect Sensitivity Analysis Using Capital District Physicians' Health Plan  
(CDPHP) Primary Care Practitioner (PCP) Assignment, with Changing PCP  
Assignment, and Including Entry and Exit

**Figure B-1. Age Distribution in 2008 Using Massachusetts Health Quality Project (MHQP) Primary Care Practitioner (PCP) Assignment, with Changing PCP Assignment, and Including Entry and Exit**

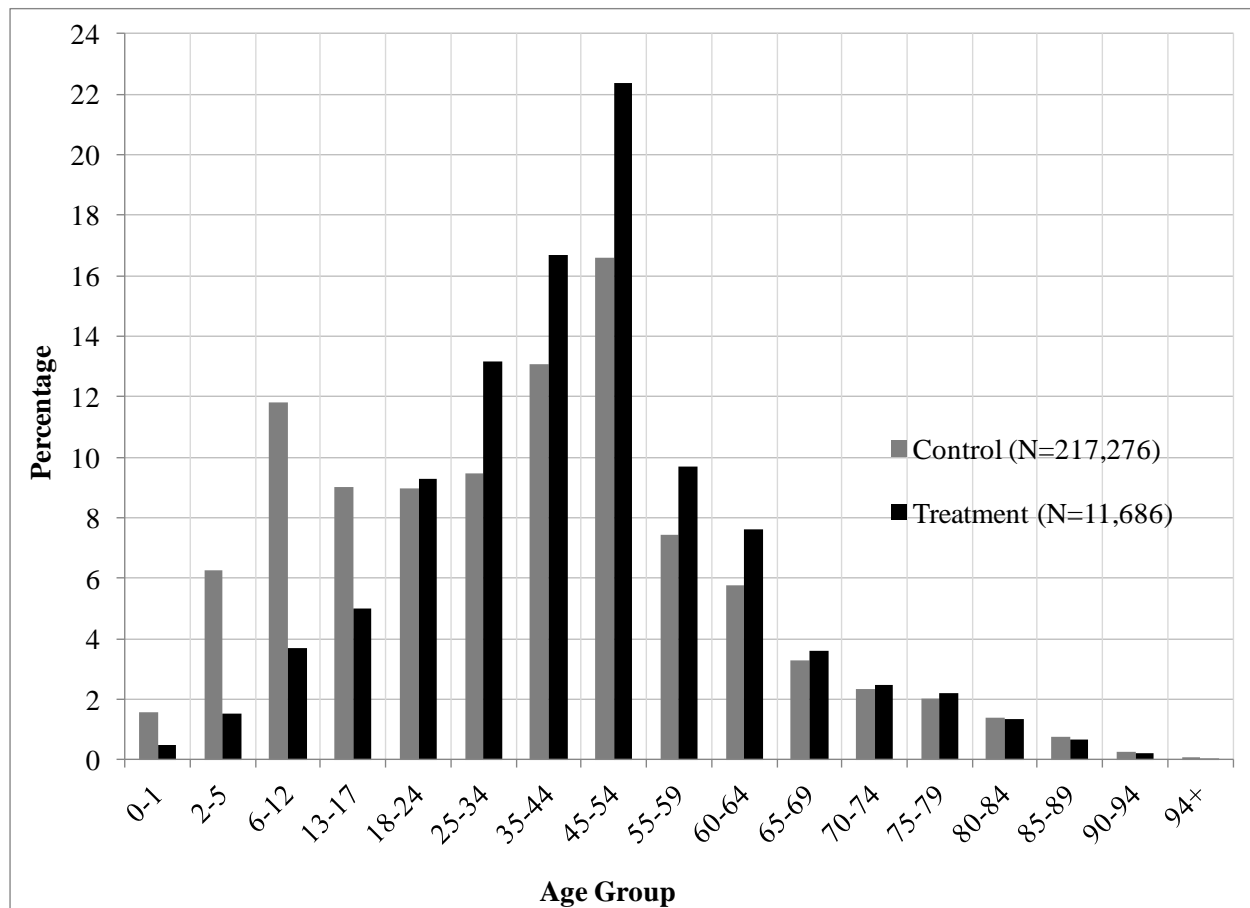

**Table B-1: Summary Statistics for Massachusetts Health Quality Project (MHQP) Primary Care Practitioner (PCP) Assignment, with Fixed 2008 PCP Assignment, and Excluding Entry and Exit**

|                                                                                                                                                                                                                                                                     | 2008      |            |                     | 2009      |            |                     | 2010      |            |                     |
|---------------------------------------------------------------------------------------------------------------------------------------------------------------------------------------------------------------------------------------------------------------------|-----------|------------|---------------------|-----------|------------|---------------------|-----------|------------|---------------------|
|                                                                                                                                                                                                                                                                     | Treatment | Control:   | Control:            | Treatment | Control:   | Control:            | Treatment | Control:   | Control:            |
|                                                                                                                                                                                                                                                                     |           | unadjusted | propensity weighted |           | unadjusted | propensity weighted |           | unadjusted | propensity weighted |
| <i>Observations:</i>                                                                                                                                                                                                                                                | 7,405     | 129,373    | 129,373             | 7,405     | 129,373    | 129,373             | 7,405     | 129,373    | 129,373             |
| <i>Payer Type</i>                                                                                                                                                                                                                                                   |           |            |                     |           |            |                     |           |            |                     |
| Medicare (%)                                                                                                                                                                                                                                                        | 11        | 11         | 11                  | 12        | 12         | 12                  | 13        | 12         | 13                  |
| Medicaid (%)                                                                                                                                                                                                                                                        | 4         | 10         | 4                   | 4         | 10         | 4                   | 4         | 10         | 4                   |
| Privately Insured (%)                                                                                                                                                                                                                                               | 85        | 79         | 85                  | 84        | 78         | 84                  | 83        | 78         | 83                  |
| <i>Plan Type</i>                                                                                                                                                                                                                                                    |           |            |                     |           |            |                     |           |            |                     |
| Health Maintenance Organization (HMO) (%)                                                                                                                                                                                                                           | 83        | 83         | 83                  | 78        | 79         | 78                  | 71        | 75         | 71                  |
| Point Of Service (POS) (%)                                                                                                                                                                                                                                          | 5         | 5          | 5                   | 2         | 2          | 2                   | 2         | 2          | 2                   |
| Preferred Provider Organization (PPO) (%)                                                                                                                                                                                                                           | 4         | 4          | 4                   | 6         | 6          | 6                   | 7         | 6          | 7                   |
| Exclusive Provider Organization (EPO) (%)                                                                                                                                                                                                                           | 9         | 8          | 9                   | 13        | 13         | 13                  | 21        | 16         | 20                  |
| <i>Insurance Type</i>                                                                                                                                                                                                                                               |           |            |                     |           |            |                     |           |            |                     |
| Administrative Services Only (ASO) (%)                                                                                                                                                                                                                              | 13        | 13         | 13                  | 13        | 13         | 13                  | 12        | 13         | 12                  |
| <i>Gender</i>                                                                                                                                                                                                                                                       |           |            |                     |           |            |                     |           |            |                     |
| Female (%)                                                                                                                                                                                                                                                          | 57        | 56         | 57                  | 57        | 56         | 57                  | 57        | 56         | 57                  |
| <i>Eligibility Months</i>                                                                                                                                                                                                                                           |           |            |                     |           |            |                     |           |            |                     |
| Mean                                                                                                                                                                                                                                                                | 12        | 12         | 12                  | 12        | 12         | 12                  | 12        | 12         | 12                  |
| Standard Deviation                                                                                                                                                                                                                                                  | 46        | 39         | 46                  | 47        | 40         | 47                  | 48        | 41         | 48                  |
| Median                                                                                                                                                                                                                                                              | 0         | 0          | 0                   | 0         | 0          | 0                   | 0         | 0          | 0                   |
| <i>Age as of Dec. 31</i>                                                                                                                                                                                                                                            |           |            |                     |           |            |                     |           |            |                     |
| Mean                                                                                                                                                                                                                                                                | 12        | 12         | 12                  | 12        | 12         | 12                  | 12        | 12         | 12                  |
| Standard Deviation                                                                                                                                                                                                                                                  | 18        | 23         | 5                   | 18        | 23         | 5                   | 18        | 23         | 5                   |
| Median                                                                                                                                                                                                                                                              | 48        | 43         | 50                  | 49        | 44         | 51                  | 50        | 45         | 51                  |
| <i>Lagged Prospective Risk Score</i>                                                                                                                                                                                                                                |           |            |                     |           |            |                     |           |            |                     |
| Mean                                                                                                                                                                                                                                                                | 1.64      | 1.66       | 1.89                | 1.78      | 1.82       | 2.08                | 1.91      | 1.99       | 2.27                |
| Standard Deviation                                                                                                                                                                                                                                                  | 7.40      | 9.07       | 0.64                | 8.67      | 10.28      | 0.72                | 9.95      | 11.25      | 0.80                |
| Median                                                                                                                                                                                                                                                              | 1.05      | 0.90       | 1.12                | 1.11      | 0.98       | 1.22                | 1.17      | 1.06       | 1.31                |
| <i>Total Medical Spending</i>                                                                                                                                                                                                                                       |           |            |                     |           |            |                     |           |            |                     |
| Mean                                                                                                                                                                                                                                                                | 2991      | 2821       | 3183                | 3228      | 3180       | 3610                | 3560      | 3524       | 4040                |
| Standard Deviation                                                                                                                                                                                                                                                  | 28867     | 36886      | 8785                | 32250     | 36025      | 8989                | 32972     | 41609      | 10397               |
| Median                                                                                                                                                                                                                                                              | 1072      | 864        | 1028                | 1088      | 955        | 1139                | 1134      | 992        | 1199                |
| Note: Eligibility months is the number of enrolled months in a plan offered by Capital District Physicians' Health Plan (CDPHP). Physician assignment is based on Massachusetts Health Quality Project (MHQP) Primary Care Practitioner (PCP) assignment algorithm. |           |            |                     |           |            |                     |           |            |                     |

**Table B-2: Summary Statistics for Massachusetts Health Quality Project (MHQP) Primary Care Practitioner (PCP) Assignment, with Fixed PCP Assignment, and Including Entry and Exit**

|                                                                                                                                                                                                                                                                     | 2008      |                     |                              | 2009      |                     |                              | 2010      |                     |                              |
|---------------------------------------------------------------------------------------------------------------------------------------------------------------------------------------------------------------------------------------------------------------------|-----------|---------------------|------------------------------|-----------|---------------------|------------------------------|-----------|---------------------|------------------------------|
|                                                                                                                                                                                                                                                                     | Treatment | Control: unadjusted | Control: propensity weighted | Treatment | Control: unadjusted | Control: propensity weighted | Treatment | Control: unadjusted | Control: propensity weighted |
|                                                                                                                                                                                                                                                                     |           |                     |                              |           |                     |                              |           |                     |                              |
| <i>Observations:</i>                                                                                                                                                                                                                                                | 11,686    | 217,276             | 217,276                      | 11,671    | 222,946             | 222,946                      | 10,903    | 217,788             | 217,788                      |
| <i>Payer Type</i>                                                                                                                                                                                                                                                   |           |                     |                              |           |                     |                              |           |                     |                              |
| Medicare (%)                                                                                                                                                                                                                                                        | 8         | 8                   | 8                            | 9         | 8                   | 9                            | 11        | 9                   | 11                           |
| Medicaid (%)                                                                                                                                                                                                                                                        | 8         | 18                  | 8                            | 9         | 20                  | 9                            | 10        | 23                  | 11                           |
| Privately Insured (%)                                                                                                                                                                                                                                               | 84        | 74                  | 83                           | 82        | 72                  | 82                           | 79        | 68                  | 79                           |
| <i>Plan Type</i>                                                                                                                                                                                                                                                    |           |                     |                              |           |                     |                              |           |                     |                              |
| Health Maintenance Organization (HMO) (%)                                                                                                                                                                                                                           | 76        | 79                  | 76                           | 74        | 77                  | 74                           | 72        | 77                  | 72                           |
| Point Of Service (POS) (%)                                                                                                                                                                                                                                          | 10        | 8                   | 10                           | 2         | 2                   | 2                            | 2         | 2                   | 2                            |
| Preferred Provider Organization (PPO) (%)                                                                                                                                                                                                                           | 4         | 4                   | 4                            | 11        | 9                   | 11                           | 6         | 6                   | 6                            |
| Exclusive Provider Organization (EPO) (%)                                                                                                                                                                                                                           | 10        | 10                  | 10                           | 13        | 12                  | 13                           | 20        | 15                  | 20                           |
| <i>Insurance Type</i>                                                                                                                                                                                                                                               |           |                     |                              |           |                     |                              |           |                     |                              |
| Administrative Services Only (ASO) (%)                                                                                                                                                                                                                              | 17        | 14                  | 17                           | 17        | 14                  | 16                           | 11        | 10                  | 11                           |
| <i>Gender</i>                                                                                                                                                                                                                                                       |           |                     |                              |           |                     |                              |           |                     |                              |
| Female (%)                                                                                                                                                                                                                                                          | 55        | 55                  | 55                           | 56        | 55                  | 56                           | 56        | 55                  | 56                           |
| <i>Eligibility Months</i>                                                                                                                                                                                                                                           |           |                     |                              |           |                     |                              |           |                     |                              |
| Mean                                                                                                                                                                                                                                                                | 11        | 11                  | 11                           | 11        | 11                  | 11                           | 11        | 11                  | 11                           |
| Standard Deviation                                                                                                                                                                                                                                                  | 43        | 36                  | 42                           | 43        | 36                  | 43                           | 44        | 37                  | 44                           |
| Median                                                                                                                                                                                                                                                              | 2         | 2                   | 0                            | 2         | 2                   | 0                            | 2         | 2                   | 0                            |
| <i>Age as of Dec. 31</i>                                                                                                                                                                                                                                            |           |                     |                              |           |                     |                              |           |                     |                              |
| Mean                                                                                                                                                                                                                                                                | 12        | 12                  | 12                           | 12        | 12                  | 12                           | 12        | 12                  | 12                           |
| Standard Deviation                                                                                                                                                                                                                                                  | 19        | 22                  | 5                            | 19        | 22                  | 5                            | 19        | 23                  | 5                            |
| Median                                                                                                                                                                                                                                                              | 45        | 37                  | 46                           | 45        | 37                  | 47                           | 46        | 38                  | 48                           |
| <i>Lagged Prospective Risk Score</i>                                                                                                                                                                                                                                |           |                     |                              |           |                     |                              |           |                     |                              |
| Mean                                                                                                                                                                                                                                                                | 1.54      | 1.56                | 1.81                         | 1.63      | 1.63                | 1.91                         | 1.76      | 1.76                | 2.09                         |
| Standard Deviation                                                                                                                                                                                                                                                  | 7.74      | 9.51                | 0.71                         | 8.80      | 10.05               | 0.74                         | 9.46      | 10.51               | 0.77                         |
| Median                                                                                                                                                                                                                                                              | 0.93      | 0.78                | 0.97                         | 0.97      | 0.80                | 1.01                         | 1.03      | 0.86                | 1.11                         |
| <i>Total Medical Spending</i>                                                                                                                                                                                                                                       |           |                     |                              |           |                     |                              |           |                     |                              |
| Mean                                                                                                                                                                                                                                                                | 3022      | 2895                | 3356                         | 3211      | 3161                | 3670                         | 3421      | 3337                | 3932                         |
| Standard Deviation                                                                                                                                                                                                                                                  | 32859     | 42777               | 10633                        | 37090     | 40686               | 9925                         | 35142     | 44027               | 10811                        |
| Median                                                                                                                                                                                                                                                              | 926       | 744                 | 895                          | 978       | 837                 | 1003                         | 1026      | 864                 | 1066                         |
| Note: Eligibility months is the number of enrolled months in a plan offered by Capital District Physicians' Health Plan (CDPHP). Physician assignment is based on Massachusetts Health Quality Project (MHQP) Primary Care Practitioner (PCP) assignment algorithm. |           |                     |                              |           |                     |                              |           |                     |                              |

**Table B-3: Summary Statistics for Massachusetts Health Quality Project (MHQP) Primary Care Practitioner (PCP) Assignment, with Changing PCP Assignment, and Including Entry and Exit**

|                                                                                                                                                                                                                                                                     | 2008      |            |                     | 2009      |            |                     | 2010      |            |                     |
|---------------------------------------------------------------------------------------------------------------------------------------------------------------------------------------------------------------------------------------------------------------------|-----------|------------|---------------------|-----------|------------|---------------------|-----------|------------|---------------------|
|                                                                                                                                                                                                                                                                     | Treatment | Control:   | Control:            | Treatment | Control:   | Control:            | Treatment | Control:   | Control:            |
|                                                                                                                                                                                                                                                                     |           | unadjusted | propensity weighted |           | unadjusted | propensity weighted |           | unadjusted | propensity weighted |
| <i>Observations:</i>                                                                                                                                                                                                                                                | 11,686    | 217,276    | 217,276             | 11,770    | 222,847    | 222,847             | 10,734    | 217,957    | 217,957             |
| <i>Payer Type</i>                                                                                                                                                                                                                                                   |           |            |                     |           |            |                     |           |            |                     |
| Medicare (%)                                                                                                                                                                                                                                                        | 8         | 8          | 8                   | 9         | 8          | 9                   | 10        | 9          | 10                  |
| Medicaid (%)                                                                                                                                                                                                                                                        | 8         | 18         | 8                   | 9         | 20         | 9                   | 10        | 23         | 10                  |
| Privately Insured (%)                                                                                                                                                                                                                                               | 84        | 74         | 83                  | 83        | 72         | 82                  | 80        | 68         | 79                  |
| <i>Plan Type</i>                                                                                                                                                                                                                                                    |           |            |                     |           |            |                     |           |            |                     |
| Health Maintenance Organization (HMO) (%)                                                                                                                                                                                                                           | 76        | 79         | 76                  | 74        | 77         | 74                  | 71        | 77         | 72                  |
| Point Of Service (POS) (%)                                                                                                                                                                                                                                          | 10        | 8          | 10                  | 2         | 2          | 2                   | 2         | 2          | 2                   |
| Preferred Provider Organization (PPO) (%)                                                                                                                                                                                                                           | 4         | 4          | 4                   | 11        | 9          | 11                  | 7         | 6          | 7                   |
| Exclusive Provider Organization (EPO) (%)                                                                                                                                                                                                                           | 10        | 10         | 10                  | 13        | 12         | 13                  | 20        | 15         | 20                  |
| <i>Insurance Type</i>                                                                                                                                                                                                                                               |           |            |                     |           |            |                     |           |            |                     |
| Administrative Services Only (ASO) (%)                                                                                                                                                                                                                              | 17        | 14         | 17                  | 17        | 14         | 16                  | 11        | 10         | 11                  |
| <i>Gender</i>                                                                                                                                                                                                                                                       |           |            |                     |           |            |                     |           |            |                     |
| Female (%)                                                                                                                                                                                                                                                          | 55        | 55         | 55                  | 56        | 55         | 56                  | 56        | 55         | 56                  |
| <i>Eligibility Months</i>                                                                                                                                                                                                                                           |           |            |                     |           |            |                     |           |            |                     |
| Mean                                                                                                                                                                                                                                                                | 11        | 11         | 11                  | 11        | 11         | 11                  | 11        | 11         | 11                  |
| Standard Deviation                                                                                                                                                                                                                                                  | 43        | 36         | 42                  | 43        | 36         | 43                  | 44        | 37         | 44                  |
| Median                                                                                                                                                                                                                                                              | 2         | 2          | 0                   | 2         | 2          | 0                   | 2         | 2          | 0                   |
| <i>Age as of Dec. 31</i>                                                                                                                                                                                                                                            |           |            |                     |           |            |                     |           |            |                     |
| Mean                                                                                                                                                                                                                                                                | 12        | 12         | 12                  | 12        | 12         | 12                  | 12        | 12         | 12                  |
| Standard Deviation                                                                                                                                                                                                                                                  | 19        | 22         | 5                   | 19        | 22         | 5                   | 19        | 23         | 5                   |
| Median                                                                                                                                                                                                                                                              | 45        | 37         | 46                  | 45        | 37         | 46                  | 46        | 38         | 47                  |
| <i>Lagged Prospective Risk Score</i>                                                                                                                                                                                                                                |           |            |                     |           |            |                     |           |            |                     |
| Mean                                                                                                                                                                                                                                                                | 1.54      | 1.56       | 1.81                | 1.62      | 1.63       | 1.90                | 1.72      | 1.76       | 2.06                |
| Standard Deviation                                                                                                                                                                                                                                                  | 7.74      | 9.51       | 0.71                | 9.01      | 10.04      | 0.74                | 9.30      | 10.51      | 0.76                |
| Median                                                                                                                                                                                                                                                              | 0.93      | 0.78       | 0.97                | 0.96      | 0.80       | 1.00                | 1.01      | 0.86       | 1.09                |
| <i>Total Medical Spending</i>                                                                                                                                                                                                                                       |           |            |                     |           |            |                     |           |            |                     |
| Mean                                                                                                                                                                                                                                                                | 3022      | 2895       | 3356                | 3239      | 3160       | 3648                | 3408      | 3337       | 3883                |
| Standard Deviation                                                                                                                                                                                                                                                  | 32859     | 42777      | 10633               | 44238     | 40309      | 9874                | 33378     | 44088      | 10671               |
| Median                                                                                                                                                                                                                                                              | 926       | 744        | 895                 | 978       | 837        | 997                 | 1026      | 864        | 1049                |
| Note: Eligibility months is the number of enrolled months in a plan offered by Capital District Physicians' Health Plan (CDPHP). Physician assignment is based on Massachusetts Health Quality Project (MHQP) Primary Care Practitioner (PCP) assignment algorithm. |           |            |                     |           |            |                     |           |            |                     |

**Table B-4: Basic Difference-in-Difference Regressions Using Massachusetts Health Quality Project (MHQP) Primary Care Practitioner (PCP) Assignment**

|                                                                                                                                                                                                                                                                                                                                                                                                                                     | Fixed 2008 PCP<br>Assignment, and<br>Excluding Entry<br>and Exit | Fixed PCP<br>Assignment, and<br>Allowing Entry and<br>Exit | Changing Patient<br>Assignment, and<br>Including Entry and<br>Exit |
|-------------------------------------------------------------------------------------------------------------------------------------------------------------------------------------------------------------------------------------------------------------------------------------------------------------------------------------------------------------------------------------------------------------------------------------|------------------------------------------------------------------|------------------------------------------------------------|--------------------------------------------------------------------|
| <i>Dependent Variable:</i>                                                                                                                                                                                                                                                                                                                                                                                                          | Annualized Medical Spending                                      |                                                            |                                                                    |
|                                                                                                                                                                                                                                                                                                                                                                                                                                     | (1)                                                              | (2)                                                        | (3)                                                                |
| <i>Parameter:</i>                                                                                                                                                                                                                                                                                                                                                                                                                   | Coefficient p-value                                              | Coefficient p-value                                        | Coefficient p-value                                                |
| Treatment X Year <sub>2009</sub>                                                                                                                                                                                                                                                                                                                                                                                                    | -194 0.20                                                        | -130 0.33                                                  | -78 0.56                                                           |
| Treatment X Year <sub>2010</sub>                                                                                                                                                                                                                                                                                                                                                                                                    | -294 0.06                                                        | -184 0.18                                                  | -144 0.28                                                          |
| No of Patient Years                                                                                                                                                                                                                                                                                                                                                                                                                 | 410,334                                                          | 692,270                                                    | 692,270                                                            |
| R-Squared                                                                                                                                                                                                                                                                                                                                                                                                                           | 0.0011                                                           | 0.0006                                                     | 0.0005                                                             |
| Dependent Mean                                                                                                                                                                                                                                                                                                                                                                                                                      | 3,428                                                            | 3,422                                                      | 3,413                                                              |
| Notes: Each model is estimated without individual fixed effects. The control variables used are dummies for 2009, 2010, treatment, and their interaction. Omitted group is year=2008. All models are weighted by months of eligibility and propensity scores; standard errors are not clustered. Physician assignment is based on Massachusetts Health Quality Project (MHQP) Primary Care Practitioner (PCP) assignment algorithm. |                                                                  |                                                            |                                                                    |

**Table B-5: Difference-in-Difference Regression Using Individual Fixed Effects and Massachusetts Health Quality Project (MHQP) Primary Care Practitioner (PCP) Assignment**

|                                                                                                                                                                                                                                                                                                                                                                                   | Fixed 2008 PCP<br>Assignment, and<br>Excluding Entry and<br>Exit |         | Fixed 2008 PCP<br>Assignment, and<br>Including Entry and<br>Exit |         | Changing PCP<br>Assignment, and<br>Including Entry and<br>Exit |         |
|-----------------------------------------------------------------------------------------------------------------------------------------------------------------------------------------------------------------------------------------------------------------------------------------------------------------------------------------------------------------------------------|------------------------------------------------------------------|---------|------------------------------------------------------------------|---------|----------------------------------------------------------------|---------|
| <i>Dependent Variable:</i>                                                                                                                                                                                                                                                                                                                                                        | Annualized Medical Spending                                      |         |                                                                  |         |                                                                |         |
|                                                                                                                                                                                                                                                                                                                                                                                   | <i>(1)</i>                                                       |         | <i>(2)</i>                                                       |         | <i>(3)</i>                                                     |         |
| <i>Parameter:</i>                                                                                                                                                                                                                                                                                                                                                                 | Coefficient                                                      | p-value | Coefficient                                                      | p-value | Coefficient                                                    | p-value |
| Treatment X Year <sub>2009</sub>                                                                                                                                                                                                                                                                                                                                                  | -198                                                             | 0.20    | -220                                                             | 0.22    | -186                                                           | 0.31    |
| Treatment X Year <sub>2010</sub>                                                                                                                                                                                                                                                                                                                                                  | -289                                                             | 0.15    | -332                                                             | 0.13    | -297                                                           | 0.24    |
| Medicare                                                                                                                                                                                                                                                                                                                                                                          | 345                                                              | 0.68    | 369                                                              | 0.68    | 555                                                            | 0.54    |
| Medicaid                                                                                                                                                                                                                                                                                                                                                                          | -258                                                             | 0.33    | 129                                                              | 0.74    | 151                                                            | 0.74    |
| Health Maintenance Organization (HMO)                                                                                                                                                                                                                                                                                                                                             | 114                                                              | 0.38    | 24                                                               | 0.94    | 18                                                             | 0.95    |
| Preferred Provider Organization (PPO)                                                                                                                                                                                                                                                                                                                                             | -1141                                                            | 0.00    | -954                                                             | 0.00    | -657                                                           | 0.01    |
| Point of Service (POS)                                                                                                                                                                                                                                                                                                                                                            | -1556                                                            | 0.00    | -1246                                                            | 0.00    | -950                                                           | 0.01    |
| Administrative Services Only (ASO)                                                                                                                                                                                                                                                                                                                                                | 1993                                                             | 0.01    | 1436                                                             | 0.00    | 926                                                            | 0.01    |
| Year <sub>2009</sub>                                                                                                                                                                                                                                                                                                                                                              | 425                                                              | 0.00    | 624                                                              | 0.00    | 622                                                            | 0.00    |
| Year <sub>2010</sub>                                                                                                                                                                                                                                                                                                                                                              | 865                                                              | 0.00    | 1092                                                             | 0.00    | 1081                                                           | 0.00    |
| Treatment                                                                                                                                                                                                                                                                                                                                                                         |                                                                  |         |                                                                  |         | 730                                                            | 0.02    |
| No. of Patient Years                                                                                                                                                                                                                                                                                                                                                              | 410,334                                                          |         | 692,270                                                          |         | 692,270                                                        |         |
| No. of Clusters (Practices)                                                                                                                                                                                                                                                                                                                                                       | 941                                                              |         | 1,122                                                            |         | 1,122                                                          |         |
| R-Squared                                                                                                                                                                                                                                                                                                                                                                         | 0.0020                                                           |         | 0.0024                                                           |         | 0.0025                                                         |         |
| Dependent Mean                                                                                                                                                                                                                                                                                                                                                                    | 3,428                                                            |         | 3,422                                                            |         | 3,413                                                          |         |
| Notes: All models are weighted by months of eligibility and propensity scores. Standard errors are clustered for practice IDs. Omitted group is year=2008, private insurance, fee-for-service or exclusive provider organization, and non-ASO. Physician assignment is based on Massachusetts Health Quality Project (MHQP) Primary Care Practitioner (PCP) assignment algorithm. |                                                                  |         |                                                                  |         |                                                                |         |

**Table B-6: Treatment Effect Sensitivity Analysis Using Massachusetts Health Quality Project (MHQP) Primary Care Practitioner (PCP) Assignment, with Fixed 2008 PCP Assignment, and Excluding Entry and Exit**

| Model Name                                                                                                                                                                                                                                                                                                                                                                                                                                                                                                                                                  | No. of Patient Years | Dependent Mean | R-square | Year 1 Effects (2009) |                |               |          | Year 2 Effects (2010) |                |               |          |
|-------------------------------------------------------------------------------------------------------------------------------------------------------------------------------------------------------------------------------------------------------------------------------------------------------------------------------------------------------------------------------------------------------------------------------------------------------------------------------------------------------------------------------------------------------------|----------------------|----------------|----------|-----------------------|----------------|---------------|----------|-----------------------|----------------|---------------|----------|
|                                                                                                                                                                                                                                                                                                                                                                                                                                                                                                                                                             |                      |                |          | Coefficient           | Standard Error | % effect 2009 | p-values | Coefficient           | Standard Error | % effect 2010 | p-values |
| I. Models of Total Medical Spending, All Payers                                                                                                                                                                                                                                                                                                                                                                                                                                                                                                             |                      |                |          |                       |                |               |          |                       |                |               |          |
| 1. All Controls                                                                                                                                                                                                                                                                                                                                                                                                                                                                                                                                             | 410,334              | 3,428          | 0.0020   | -198                  | 156            | -5.8%         | 0.20     | -289                  | 199            | -8.4%         | 0.15     |
| 2. Basic Difference-in-Difference                                                                                                                                                                                                                                                                                                                                                                                                                                                                                                                           | 410,334              | 3,428          | 0.0018   | -198                  | 153            | -5.8%         | 0.20     | -298                  | 202            | -8.7%         | 0.14     |
| II. By Physician Specialty                                                                                                                                                                                                                                                                                                                                                                                                                                                                                                                                  |                      |                |          |                       |                |               |          |                       |                |               |          |
| 3. Primary Care Specialties Only                                                                                                                                                                                                                                                                                                                                                                                                                                                                                                                            | 380,320              | 3,495          | 0.0021   | -184                  | 156            | -5.3%         | 0.24     | -270                  | 199            | -7.7%         | 0.17     |
| 4. Non-Pediatric Primary Care Specialties                                                                                                                                                                                                                                                                                                                                                                                                                                                                                                                   | 263,132              | 3,563          | 0.0023   | -249                  | 163            | -7.0%         | 0.13     | -353                  | 212            | -9.9%         | 0.10     |
| III. By Payer                                                                                                                                                                                                                                                                                                                                                                                                                                                                                                                                               |                      |                |          |                       |                |               |          |                       |                |               |          |
| 5. Medicare Only                                                                                                                                                                                                                                                                                                                                                                                                                                                                                                                                            | 47,660               | 6,301          | 0.0041   | -378                  | 400            | -6.0%         | 0.34     | -244                  | 391            | -3.9%         | 0.53     |
| 6. Medicaid Only                                                                                                                                                                                                                                                                                                                                                                                                                                                                                                                                            | 40,074               | 1,785          | 0.0009   | -95                   | 226            | -5.3%         | 0.68     | 72                    | 310            | 4.1%          | 0.82     |
| 7. Privately Insured Only                                                                                                                                                                                                                                                                                                                                                                                                                                                                                                                                   | 322,600              | 3,104          | 0.0019   | -178                  | 141            | -5.7%         | 0.21     | -311                  | 197            | -10.0%        | 0.12     |
| IV. By Place of Service                                                                                                                                                                                                                                                                                                                                                                                                                                                                                                                                     |                      |                |          |                       |                |               |          |                       |                |               |          |
| 8. Inpatient Care                                                                                                                                                                                                                                                                                                                                                                                                                                                                                                                                           | 410,334              | 912            | 0.0005   | -66                   | 65             | -7.2%         | 0.31     | -102                  | 90             | -11.1%        | 0.26     |
| 9. Emergency Care                                                                                                                                                                                                                                                                                                                                                                                                                                                                                                                                           | 410,334              | 2,391          | 0.0039   | -124                  | 96             | -5.2%         | 0.19     | -167                  | 112            | -7.0%         | 0.14     |
| 10. Outpatient Care, and Other Care                                                                                                                                                                                                                                                                                                                                                                                                                                                                                                                         | 410,334              | 92             | 0.0002   | -10                   | 4              | -11.0%        | 0.01     | -9                    | 6              | -9.6%         | 0.12     |
| V. By Type of Service†                                                                                                                                                                                                                                                                                                                                                                                                                                                                                                                                      |                      |                |          |                       |                |               |          |                       |                |               |          |
| 11. Evaluation & Management                                                                                                                                                                                                                                                                                                                                                                                                                                                                                                                                 | 410,334              | 704            | 0.0106   | -24                   | 8              | -3.4%         | 0.00     | -46                   | 9              | -6.5%         | 0.00     |
| 12. Procedures                                                                                                                                                                                                                                                                                                                                                                                                                                                                                                                                              | 410,334              | 841            | 0.0008   | -63                   | 40             | -7.5%         | 0.12     | -77                   | 49             | -9.1%         | 0.12     |
| 13. Imaging                                                                                                                                                                                                                                                                                                                                                                                                                                                                                                                                                 | 410,334              | 376            | 0.0004   | -19                   | 11             | -5.2%         | 0.07     | -15                   | 12             | -4.0%         | 0.20     |
| 14. Tests                                                                                                                                                                                                                                                                                                                                                                                                                                                                                                                                                   | 410,334              | 175            | 0.0008   | -14                   | 10             | -8.2%         | 0.15     | -29                   | 13             | -16.5%        | 0.02     |
| 15. Durable Medical Equipment                                                                                                                                                                                                                                                                                                                                                                                                                                                                                                                               | 410,334              | 113            | 0.0001   | -5                    | 9              | -4.0%         | 0.60     | 1                     | 31             | 1.0%          | 0.97     |
| 16. Others                                                                                                                                                                                                                                                                                                                                                                                                                                                                                                                                                  | 410,334              | 238            | 0.0012   | -24                   | 18             | -10.2%        | 0.18     | -4                    | 37             | -1.7%         | 0.91     |
| Notes: Each row is from a different regression. All models weighted by months of eligibility and propensity scores; standard errors are clustered for practice IDs. All models include individual fixed effects. In addition, models 5-7 include fixed effects for insurance type and plan type, while the remaining models include fixed effects for insurance type, plan type and payer type. †Clinical categories designated according to the Berenson-Eggers Type of Service (BETOS) classification, version 2012, applied to professional claims only. |                      |                |          |                       |                |               |          |                       |                |               |          |

**Table B-7: Treatment Effect Sensitivity Analysis Using Massachusetts Health Quality Project (MHQP) Primary Care Practitioner (PCP) Assignment, with Fixed PCP Assignment, and Including Entry and Exit**

| Model Name                                      | No. of Patient Years | Dependent Mean | R-square | Year 1 Effects (2009) |                |               |          | Year 2 Effects (2010) |                |               |          |
|-------------------------------------------------|----------------------|----------------|----------|-----------------------|----------------|---------------|----------|-----------------------|----------------|---------------|----------|
|                                                 |                      |                |          | Coefficient           | Standard Error | % effect 2009 | p-values | Coefficient           | Standard Error | % effect 2010 | p-values |
| I. Models of Total Medical Spending, All Payers |                      |                |          |                       |                |               |          |                       |                |               |          |
| 1. All Controls                                 | 692,270              | 3,422          | 0.0024   | -220                  | 180            | -6.4%         | 0.22     | -332                  | 219            | -9.7%         | 0.13     |
| 2. Basic Difference-in-Difference               | 692,270              | 3,422          | 0.0023   | -218                  | 174            | -6.4%         | 0.21     | -337                  | 220            | -9.8%         | 0.13     |
| II. By Physician Specialty                      |                      |                |          |                       |                |               |          |                       |                |               |          |
| 3. Primary Care Specialties Only                | 623,836              | 3,500          | 0.0026   | -218                  | 184            | -6.2%         | 0.23     | -320                  | 226            | -9.1%         | 0.16     |
| 4. Non-Pediatric Primary Care Specialties       | 424,451              | 3,574          | 0.0029   | -297                  | 196            | -8.3%         | 0.13     | -429                  | 244            | -12.0%        | 0.08     |
| III. By Payer                                   |                      |                |          |                       |                |               |          |                       |                |               |          |
| 5. Medicare Only                                | 58,961               | 7,510          | 0.0087   | -852                  | 438            | -11.4%        | 0.05     | -856                  | 559            | -11.4%        | 0.13     |
| 6. Medicaid Only                                | 136,588              | 2,106          | 0.0009   | -8                    | 355            | -0.4%         | 0.98     | -31                   | 308            | -1.5%         | 0.92     |
| 7. Privately Insured Only                       | 496,721              | 3,084          | 0.0020   | -165                  | 158            | -5.4%         | 0.29     | -289                  | 209            | -9.4%         | 0.17     |
| IV. By Place of Service                         |                      |                |          |                       |                |               |          |                       |                |               |          |
| 8. Inpatient Care                               | 692,270              | 1,014          | 0.0008   | -141                  | 95             | -13.9%        | 0.14     | -166                  | 118            | -16.4%        | 0.16     |
| 9. Emergency Care                               | 692,270              | 2,264          | 0.0037   | -62                   | 106            | -2.7%         | 0.56     | -134                  | 109            | -5.9%         | 0.22     |
| 10. Outpatient Care, and Other Care             | 692,270              | 103            | 0.0002   | -14                   | 4              | -13.4%        | 0.00     | -8                    | 6              | -7.7%         | 0.19     |
| V. By Type of Service†                          |                      |                |          |                       |                |               |          |                       |                |               |          |
| 11. Evaluation & Management                     | 692,270              | 669            | 0.0096   | -32                   | 8              | -4.7%         | 0.00     | -51                   | 8              | -7.6%         | 0.00     |
| 12. Procedures                                  | 692,270              | 792            | 0.0008   | -36                   | 46             | -4.5%         | 0.44     | -66                   | 52             | -8.3%         | 0.20     |
| 13. Imaging                                     | 692,270              | 352            | 0.0005   | -22                   | 9              | -6.1%         | 0.02     | -16                   | 14             | -4.4%         | 0.27     |
| 14. Tests                                       | 692,270              | 164            | 0.0008   | -11                   | 13             | -6.6%         | 0.39     | -20                   | 14             | -12.1%        | 0.16     |
| 15. Durable Medical Equipment                   | 692,270              | 104            | 0.0002   | -3                    | 9              | -2.7%         | 0.76     | 5                     | 24             | 5.0%          | 0.82     |
| 16. Others                                      | 692,270              | 245            | 0.0010   | 6                     | 28             | 2.5%          | 0.83     | -2                    | 41             | -0.8%         | 0.96     |
| VI. By Categories of Eligibility                |                      |                |          |                       |                |               |          |                       |                |               |          |
| 17. Eligible for at least one month each year   | 503,265              | 3,461          | 0.0025   | -134                  | 133            | -3.9%         | 0.32     | -308                  | 199            | -8.9%         | 0.12     |
| 18. Full 36 months eligibility (2008-2010)      | 410,334              | 3,412          | 0.0020   | -189                  | 157            | -5.5%         | 0.23     | -277                  | 199            | -8.1%         | 0.16     |
| 19. Less than 36 months eligibility (2008-2010) | 281,936              | 3,442          | 0.0051   | -334                  | 374            | -9.7%         | 0.37     | -572                  | 486            | -16.6%        | 0.24     |
| 20. New Arrivers and Early Departers            | 189,005              | 3,287          | 0.0042   | -632                  | 529            | -19.2%        | 0.23     | -578                  | 450            | -17.6%        | 0.20     |

Notes: Each row is from a different regression. All models are weighted by months of eligibility and propensity scores. Standard errors are clustered for practice IDs. All models include individual fixed effects. In addition, models 5-7 include fixed effects for insurance type and plan type, while the remaining models include fixed effects for insurance type, plan type and payer type. †Clinical categories designated according to the Berenson-Eggers Type of Service (BETOS) classification, version 2012, applied to professional claims only.

**Table B-8: Treatment Effect Sensitivity Analysis Using Massachusetts Health Quality Project (MHQP) Primary Care Practitioner (PCP) Assignment, with Changing PCP Assignment, and Including Entry and Exit**

| Model Name                                      | No. of Patient Years | Dependent Mean | R-square | Year 1 Effects (2009) |                |               |          | Year 2 Effects (2010) |                |               |          |
|-------------------------------------------------|----------------------|----------------|----------|-----------------------|----------------|---------------|----------|-----------------------|----------------|---------------|----------|
|                                                 |                      |                |          | Coefficient           | Standard Error | % effect 2009 | p-values | Coefficient           | Standard Error | % effect 2010 | p-values |
| I. Models of Total Medical Spending, All Payers |                      |                |          |                       |                |               |          |                       |                |               |          |
| 1. All Controls                                 | 692,270              | 3,413          | 0.0025   | -186                  | 183            | -5.4%         | 0.31     | -297                  | 254            | -8.7%         | 0.24     |
| 2. Basic Difference-in-Difference               | 692,270              | 3,413          | 0.0024   | -184                  | 176            | -5.4%         | 0.30     | -299                  | 255            | -8.8%         | 0.24     |
| II. By Physician Specialty                      |                      |                |          |                       |                |               |          |                       |                |               |          |
| 3. Primary Care Specialties Only                | 623,836              | 3,469          | 0.0025   | -206                  | 186            | -5.9%         | 0.27     | -327                  | 259            | -9.4%         | 0.21     |
| 4. Non-Pediatric Primary Care Specialties       | 424,451              | 3,562          | 0.0030   | -284                  | 198            | -8.0%         | 0.15     | -408                  | 278            | -11.4%        | 0.14     |
| III. By Payer                                   |                      |                |          |                       |                |               |          |                       |                |               |          |
| 5. Medicare Only                                | 58,961               | 7,510          | 0.0084   | -958                  | 575            | -12.8%        | 0.10     | -716                  | 593            | -9.5%         | 0.23     |
| 6. Medicaid Only                                | 136,588              | 2,118          | 0.0010   | 149                   | 334            | 7.0%          | 0.66     | 54                    | 274            | 2.6%          | 0.84     |
| 7. Privately Insured Only                       | 496,721              | 3,076          | 0.0020   | -130                  | 154            | -4.2%         | 0.40     | -283                  | 239            | -9.2%         | 0.24     |
| IV. By Place of Service                         |                      |                |          |                       |                |               |          |                       |                |               |          |
| 8. Inpatient Care                               | 692,270              | 1,009          | 0.0008   | -135                  | 83             | -13.4%        | 0.10     | -178                  | 137            | -17.7%        | 0.19     |
| 9. Emergency Care                               | 692,270              | 2,262          | 0.0037   | -36                   | 115            | -1.6%         | 0.76     | -91                   | 123            | -4.0%         | 0.46     |
| 10. Outpatient Care, and Other Care             | 692,270              | 103            | 0.0001   | -10                   | 4              | -10.0%        | 0.01     | -7                    | 6              | -6.6%         | 0.30     |
| V. By Type of Service†                          |                      |                |          |                       |                |               |          |                       |                |               |          |
| 11. Evaluation & Management                     | 692,270              | 668            | 0.0096   | -25                   | 7              | -3.7%         | 0.00     | -47                   | 7              | -7.0%         | 0.00     |
| 12. Procedures                                  | 692,270              | 793            | 0.0009   | -15                   | 47             | -1.9%         | 0.75     | -42                   | 61             | -5.3%         | 0.49     |
| 13. Imaging                                     | 692,270              | 349            | 0.0005   | -16                   | 10             | -4.5%         | 0.13     | -12                   | 16             | -3.3%         | 0.48     |
| 14. Tests                                       | 692,270              | 164            | 0.0008   | -8                    | 13             | -5.0%         | 0.53     | -23                   | 15             | -14.2%        | 0.12     |
| 15. Durable Medical Equipment                   | 692,270              | 103            | 0.0002   | -2                    | 9              | -1.7%         | 0.85     | 2                     | 25             | 1.5%          | 0.95     |
| 16. Others                                      | 692,270              | 246            | 0.0010   | 13                    | 31             | 5.3%          | 0.67     | 8                     | 47             | 3.2%          | 0.87     |
| VI. By Categories of Eligibility                |                      |                |          |                       |                |               |          |                       |                |               |          |
| 17. Eligible for at least one month each year   | 503,265              | 3,436          | 0.0025   | -107                  | 132            | -3.1%         | 0.42     | -267                  | 236            | -7.8%         | 0.26     |
| 18. Full 36 months eligibility (2008-2010)      | 410,334              | 3,391          | 0.0020   | -171                  | 160            | -5.0%         | 0.28     | -233                  | 226            | -6.9%         | 0.30     |
| 19. Less than 36 months eligibility (2008-2010) | 281,936              | 3,458          | 0.0053   | -213                  | 348            | -6.1%         | 0.54     | -490                  | 472            | -14.2%        | 0.30     |
| 20. New Arrivers and Early Departers            | 189,005              | 3,334          | 0.0048   | -554                  | 540            | -16.6%        | 0.30     | -600                  | 477            | -18.0%        | 0.21     |

Notes: Each row is from a different regression. All models are weighted by months of eligibility and propensity scores. Standard errors are clustered for practice IDs. All models include individual fixed effects. In addition, models 5-7 include fixed effects for insurance type and plan type, while the remaining models include fixed effects for insurance type, plan type and payer type. †Clinical categories designated according to the Berenson-Eggers Type of Service (BETOS) classification, version 2012, applied to professional claims only.

**Table B-9: Treatment Effect Sensitivity Analysis Using Capital District Physicians' Health Plan (CDPHP) Primary Care Practitioner (PCP) Assignment, with Fixed 2008 PCP Assignment, and Excluding Entry and Exit**

| Model Name                                      | No. of Patient Years | Dependent Mean | R-square | Year 1 Effects (2009) |                |               |          | Year 2 Effects (2010) |                |               |          |
|-------------------------------------------------|----------------------|----------------|----------|-----------------------|----------------|---------------|----------|-----------------------|----------------|---------------|----------|
|                                                 |                      |                |          | Coefficient           | Standard Error | % effect 2009 | p-values | Coefficient           | Standard Error | % effect 2010 | p-values |
| I. Models of Total Medical Spending, All Payers |                      |                |          |                       |                |               |          |                       |                |               |          |
| 1. All Controls                                 | 304,260              | 3,628          | 0.0026   | -84                   | 177            | -2.3%         | 0.63     | -165                  | 237            | -4.5%         | 0.49     |
| 2. Basic Difference-in-Difference               | 304,260              | 3,628          | 0.0023   | -84                   | 174            | -2.3%         | 0.63     | -172                  | 237            | -4.7%         | 0.47     |
| II. By Physician Specialty                      |                      |                |          |                       |                |               |          |                       |                |               |          |
| 3. Primary Care Specialties Only                | 294,562              | 3,568          | 0.0023   | -102                  | 178            | -2.9%         | 0.57     | -161                  | 238            | -4.5%         | 0.50     |
| 4. Non-Pediatric Primary Care Specialties       | 200,072              | 3,639          | 0.0026   | -174                  | 187            | -4.8%         | 0.35     | -224                  | 251            | -6.2%         | 0.37     |
| III. By Payer                                   |                      |                |          |                       |                |               |          |                       |                |               |          |
| 5. Medicare Only                                | 40,545               | 6,489          | 0.0047   | -140                  | 443            | -2.2%         | 0.75     | -146                  | 339            | -2.3%         | 0.67     |
| 6. Medicaid Only                                | 29,011               | 1,990          | 0.0025   | -234                  | 175            | -11.7%        | 0.18     | 48                    | 348            | 2.4%          | 0.89     |
| 7. Privately Insured Only                       | 234,704              | 3,237          | 0.0024   | -66                   | 181            | -2.0%         | 0.72     | -169                  | 261            | -5.2%         | 0.52     |
| IV. By Place of Service                         |                      |                |          |                       |                |               |          |                       |                |               |          |
| 8. Inpatient Care                               | 304,260              | 924            | 0.0006   | -22                   | 75             | -2.4%         | 0.77     | -99                   | 96             | -10.7%        | 0.30     |
| 9. Emergency Care                               | 304,260              | 2,576          | 0.0048   | -60                   | 114            | -2.3%         | 0.60     | -71                   | 141            | -2.8%         | 0.61     |
| 10. Outpatient Care, and Other Care             | 304,260              | 96             | 0.0004   | -9                    | 5              | -9.6%         | 0.06     | -2                    | 6              | -1.7%         | 0.79     |
| V. By Type of Service†                          |                      |                |          |                       |                |               |          |                       |                |               |          |
| 11. Evaluation & Management                     | 304,260              | 767            | 0.0127   | -10                   | 13             | -1.3%         | 0.42     | -32                   | 8              | -4.1%         | 0.00     |
| 12. Procedures                                  | 304,260              | 891            | 0.0013   | -12                   | 48             | -1.3%         | 0.80     | -14                   | 58             | -1.6%         | 0.80     |
| 13. Imaging                                     | 304,260              | 405            | 0.0005   | -11                   | 15             | -2.7%         | 0.46     | 2                     | 19             | 0.4%          | 0.93     |
| 14. Tests                                       | 304,260              | 192            | 0.0007   | -7                    | 13             | -3.8%         | 0.56     | -20                   | 16             | -10.6%        | 0.21     |
| 15. Durable Medical Equipment                   | 304,260              | 122            | 0.0001   | -8                    | 17             | -6.8%         | 0.63     | -5                    | 34             | -4.0%         | 0.88     |
| 16. Others                                      | 304,260              | 245            | 0.0016   | -14                   | 20             | -5.9%         | 0.48     | 18                    | 42             | 7.4%          | 0.67     |

Notes: Each row is from a different regression. All models are weighted by months of eligibility and propensity scores. Standard errors are clustered for practice IDs. All models include individual fixed effects. In addition, models 5-7 include fixed effects for insurance type and plan type, while the remaining models include fixed effects for insurance type, plan type and payer type. †Clinical categories designated according to the Berenson-Eggers Type of Service (BETOS) classification, version 2012, applied to professional claims only.

**Table B-10: Treatment Effect Sensitivity Analysis Using Capital District Physicians' Health Plan (CDPHP) Primary Care Practitioner (PCP) Assignment, with Fixed PCP Assignment, and Including Entry and Exit**

| Model Name                                                                                                                                                                                                                                                                                                                                                                                                                                                                                                                                                      | No. of Patient Years | Dependent Mean | R-square | Year 1 Effects (2009) |                |               |          | Year 2 Effects (2010) |                |               |          |
|-----------------------------------------------------------------------------------------------------------------------------------------------------------------------------------------------------------------------------------------------------------------------------------------------------------------------------------------------------------------------------------------------------------------------------------------------------------------------------------------------------------------------------------------------------------------|----------------------|----------------|----------|-----------------------|----------------|---------------|----------|-----------------------|----------------|---------------|----------|
|                                                                                                                                                                                                                                                                                                                                                                                                                                                                                                                                                                 |                      |                |          | Coefficient           | Standard Error | % effect 2009 | p-values | Coefficient           | Standard Error | % effect 2010 | p-values |
| I. Models of Total Medical Spending, All Payers                                                                                                                                                                                                                                                                                                                                                                                                                                                                                                                 |                      |                |          |                       |                |               |          |                       |                |               |          |
| 1. All Controls                                                                                                                                                                                                                                                                                                                                                                                                                                                                                                                                                 | 573,476              | 3,495          | 0.0028   | -138                  | 191            | -4.0%         | 0.47     | -231                  | 273            | -6.6%         | 0.40     |
| 2. Basic Difference-in-Difference                                                                                                                                                                                                                                                                                                                                                                                                                                                                                                                               | 573,476              | 3,495          | 0.0026   | -138                  | 179            | -4.0%         | 0.44     | -234                  | 266            | -6.7%         | 0.38     |
| II. By Physician Specialty                                                                                                                                                                                                                                                                                                                                                                                                                                                                                                                                      |                      |                |          |                       |                |               |          |                       |                |               |          |
| 3. Primary Care Specialties Only                                                                                                                                                                                                                                                                                                                                                                                                                                                                                                                                | 549,373              | 3,415          | 0.0026   | -136                  | 193            | -4.0%         | 0.48     | -212                  | 272            | -6.2%         | 0.44     |
| 4. Non-Pediatric Primary Care Specialties                                                                                                                                                                                                                                                                                                                                                                                                                                                                                                                       | 372,093              | 3,480          | 0.0029   | -218                  | 205            | -6.3%         | 0.29     | -311                  | 291            | -8.9%         | 0.29     |
| III. By Payer                                                                                                                                                                                                                                                                                                                                                                                                                                                                                                                                                   |                      |                |          |                       |                |               |          |                       |                |               |          |
| 5. Medicare Only                                                                                                                                                                                                                                                                                                                                                                                                                                                                                                                                                | 54,306               | 7,517          | 0.0086   | -1107                 | 431            | -14.7%        | 0.01     | -1063                 | 551            | -14.1%        | 0.05     |
| 6. Medicaid Only                                                                                                                                                                                                                                                                                                                                                                                                                                                                                                                                                | 107,408              | 2,222          | 0.0012   | -147                  | 239            | -6.6%         | 0.54     | -238                  | 376            | -10.7%        | 0.53     |
| 7. Privately Insured Only                                                                                                                                                                                                                                                                                                                                                                                                                                                                                                                                       | 411,762              | 3,129          | 0.0024   | -15                   | 199            | -0.5%         | 0.94     | -111                  | 317            | -3.6%         | 0.72     |
| IV. By Place of Service                                                                                                                                                                                                                                                                                                                                                                                                                                                                                                                                         |                      |                |          |                       |                |               |          |                       |                |               |          |
| 8. Inpatient Care                                                                                                                                                                                                                                                                                                                                                                                                                                                                                                                                               | 573,476              | 989            | 0.0009   | -111                  | 89             | -11.3%        | 0.21     | -137                  | 137            | -13.8%        | 0.32     |
| 9. Emergency Care                                                                                                                                                                                                                                                                                                                                                                                                                                                                                                                                               | 573,476              | 2,367          | 0.0043   | -14                   | 113            | -0.6%         | 0.90     | -73                   | 143            | -3.1%         | 0.61     |
| 10. Outpatient Care, and Other Care                                                                                                                                                                                                                                                                                                                                                                                                                                                                                                                             | 573,476              | 104            | 0.0002   | -11                   | 5              | -10.4%        | 0.03     | -2                    | 6              | -1.9%         | 0.76     |
| V. By Type of Service†                                                                                                                                                                                                                                                                                                                                                                                                                                                                                                                                          |                      |                |          |                       |                |               |          |                       |                |               |          |
| 11. Evaluation & Management                                                                                                                                                                                                                                                                                                                                                                                                                                                                                                                                     | 573,476              | 707            | 0.0109   | -16                   | 10             | -2.3%         | 0.11     | -37                   | 8              | -5.2%         | 0.00     |
| 12. Procedures                                                                                                                                                                                                                                                                                                                                                                                                                                                                                                                                                  | 573,476              | 815            | 0.0011   | 4                     | 55             | 0.5%          | 0.94     | -33                   | 64             | -4.1%         | 0.61     |
| 13. Imaging                                                                                                                                                                                                                                                                                                                                                                                                                                                                                                                                                     | 573,476              | 369            | 0.0005   | -13                   | 12             | -3.6%         | 0.28     | -7                    | 19             | -1.9%         | 0.71     |
| 14. Tests                                                                                                                                                                                                                                                                                                                                                                                                                                                                                                                                                       | 573,476              | 174            | 0.0009   | -4                    | 15             | -2.5%         | 0.77     | -17                   | 18             | -9.8%         | 0.35     |
| 15. Durable Medical Equipment                                                                                                                                                                                                                                                                                                                                                                                                                                                                                                                                   | 573,476              | 107            | 0.0002   | -7                    | 11             | -6.7%         | 0.51     | -4                    | 27             | -3.3%         | 0.90     |
| 16. Others                                                                                                                                                                                                                                                                                                                                                                                                                                                                                                                                                      | 573,476              | 245            | 0.0013   | 9                     | 23             | 3.8%          | 0.68     | 27                    | 39             | 11.1%         | 0.48     |
| VI. By Categories of Eligibility                                                                                                                                                                                                                                                                                                                                                                                                                                                                                                                                |                      |                |          |                       |                |               |          |                       |                |               |          |
| 17. Eligible for at least one month each year                                                                                                                                                                                                                                                                                                                                                                                                                                                                                                                   | 359,064              | 3,661          | 0.0030   | -33                   | 168            | -0.9%         | 0.85     | -207                  | 244            | -5.7%         | 0.40     |
| 18. Full 36 months eligibility (2008-2010)                                                                                                                                                                                                                                                                                                                                                                                                                                                                                                                      | 304,260              | 3,593          | 0.0025   | -71                   | 177            | -2.0%         | 0.69     | -144                  | 237            | -4.0%         | 0.54     |
| 19. Less than 36 months eligibility (2008-2010)                                                                                                                                                                                                                                                                                                                                                                                                                                                                                                                 | 269,216              | 3,355          | 0.0042   | -318                  | 233            | -9.5%         | 0.17     | -504                  | 427            | -15.0%        | 0.24     |
| 20. New Arrivers and Early Departers                                                                                                                                                                                                                                                                                                                                                                                                                                                                                                                            | 214,412              | 3,180          | 0.0033   | -487                  | 514            | -15.3%        | 0.34     | -355                  | 647            | -11.2%        | 0.58     |
| Notes: Each row is from a different regression. All models are weighted by months of eligibility and propensity scores. Standard errors are clustered for practice IDs. All models include individual fixed effects. In addition, models 5-7 include fixed effects for insurance type and plan type, while the remaining models include fixed effects for insurance type, plan type and payer type. †Clinical categories designated according to the Berenson-Eggers Type of Service (BETOS) classification, version 2012, applied to professional claims only. |                      |                |          |                       |                |               |          |                       |                |               |          |

**Table B-11: Treatment Effect Sensitivity Analysis Using Capital District Physicians' Health Plan (CDPHP) Primary Care Practitioner (PCP) Assignment, with Changing PCP Assignment, and Including Entry and Exit**

| Model Name                                                                                                                                                                                                                                                                                                                                                                                                                                                                                                                                                      | No. of Patient Years | Dependent Mean | R-square | Year 1 Effects (2009) |                |               |          | Year 2 Effects (2010) |                |               |          |
|-----------------------------------------------------------------------------------------------------------------------------------------------------------------------------------------------------------------------------------------------------------------------------------------------------------------------------------------------------------------------------------------------------------------------------------------------------------------------------------------------------------------------------------------------------------------|----------------------|----------------|----------|-----------------------|----------------|---------------|----------|-----------------------|----------------|---------------|----------|
|                                                                                                                                                                                                                                                                                                                                                                                                                                                                                                                                                                 |                      |                |          | Coefficient           | Standard Error | % effect 2009 | p-values | Coefficient           | Standard Error | % effect 2010 | p-values |
| I. Models of Total Medical Spending, All Payers                                                                                                                                                                                                                                                                                                                                                                                                                                                                                                                 |                      |                |          |                       |                |               |          |                       |                |               |          |
| 1. All Controls                                                                                                                                                                                                                                                                                                                                                                                                                                                                                                                                                 | 573,476              | 3,436          | 0.0025   | -285                  | 171            | -8.3%         | 0.10     | -367                  | 282            | -10.7%        | 0.19     |
| 2. Basic Difference-in-Difference                                                                                                                                                                                                                                                                                                                                                                                                                                                                                                                               | 573,476              | 3,436          | 0.0024   | -285                  | 161            | -8.3%         | 0.08     | -365                  | 277            | -10.6%        | 0.19     |
| II. By Physician Specialty                                                                                                                                                                                                                                                                                                                                                                                                                                                                                                                                      |                      |                |          |                       |                |               |          |                       |                |               |          |
| 3. Primary Care Specialties Only                                                                                                                                                                                                                                                                                                                                                                                                                                                                                                                                | 549,373              | 3,375          | 0.0024   | -261                  | 171            | -7.7%         | 0.13     | -294                  | 278            | -8.7%         | 0.29     |
| 4. Non-Pediatric Primary Care Specialties                                                                                                                                                                                                                                                                                                                                                                                                                                                                                                                       | 372,093              | 3,465          | 0.0027   | -324                  | 181            | -9.3%         | 0.07     | -393                  | 296            | -11.3%        | 0.18     |
| III. By Payer                                                                                                                                                                                                                                                                                                                                                                                                                                                                                                                                                   |                      |                |          |                       |                |               |          |                       |                |               |          |
| 5. Medicare Only                                                                                                                                                                                                                                                                                                                                                                                                                                                                                                                                                | 54,306               | 7,362          | 0.0075   | -1537                 | 440            | -20.9%        | 0.00     | -1300                 | 664            | -17.7%        | 0.05     |
| 6. Medicaid Only                                                                                                                                                                                                                                                                                                                                                                                                                                                                                                                                                | 107,408              | 2,196          | 0.0010   | -168                  | 271            | -7.7%         | 0.53     | -582                  | 320            | -26.5%        | 0.07     |
| 7. Privately Insured Only                                                                                                                                                                                                                                                                                                                                                                                                                                                                                                                                       | 411,762              | 3,089          | 0.0021   | -142                  | 164            | -4.6%         | 0.39     | -225                  | 334            | -7.3%         | 0.50     |
| IV. By Place of Service                                                                                                                                                                                                                                                                                                                                                                                                                                                                                                                                         |                      |                |          |                       |                |               |          |                       |                |               |          |
| 8. Inpatient Care                                                                                                                                                                                                                                                                                                                                                                                                                                                                                                                                               | 573,476              | 961            | 0.0008   | -188                  | 69             | -19.5%        | 0.01     | -228                  | 132            | -23.7%        | 0.08     |
| 9. Emergency Care                                                                                                                                                                                                                                                                                                                                                                                                                                                                                                                                               | 573,476              | 2,341          | 0.0040   | -78                   | 108            | -3.3%         | 0.47     | -115                  | 157            | -4.9%         | 0.46     |
| 10. Outpatient Care, and Other Care                                                                                                                                                                                                                                                                                                                                                                                                                                                                                                                             | 573,476              | 103            | 0.0002   | -10                   | 5              | -9.6%         | 0.05     | -3                    | 6              | -3.2%         | 0.59     |
| V. By Type of Service†                                                                                                                                                                                                                                                                                                                                                                                                                                                                                                                                          |                      |                |          |                       |                |               |          |                       |                |               |          |
| 11. Evaluation & Management                                                                                                                                                                                                                                                                                                                                                                                                                                                                                                                                     | 573,476              | 700            | 0.0107   | -23                   | 9              | -3.3%         | 0.01     | -46                   | 8              | -6.5%         | 0.00     |
| 12. Procedures                                                                                                                                                                                                                                                                                                                                                                                                                                                                                                                                                  | 573,476              | 807            | 0.0011   | -15                   | 55             | -1.8%         | 0.79     | -37                   | 74             | -4.6%         | 0.61     |
| 13. Imaging                                                                                                                                                                                                                                                                                                                                                                                                                                                                                                                                                     | 573,476              | 363            | 0.0004   | -19                   | 10             | -5.1%         | 0.07     | -11                   | 21             | -3.1%         | 0.60     |
| 14. Tests                                                                                                                                                                                                                                                                                                                                                                                                                                                                                                                                                       | 573,476              | 172            | 0.0008   | -9                    | 13             | -5.2%         | 0.48     | -21                   | 19             | -12.0%        | 0.28     |
| 15. Durable Medical Equipment                                                                                                                                                                                                                                                                                                                                                                                                                                                                                                                                   | 573,476              | 104            | 0.0002   | -17                   | 9              | -16.0%        | 0.08     | -12                   | 28             | -11.8%        | 0.66     |
| 16. Others                                                                                                                                                                                                                                                                                                                                                                                                                                                                                                                                                      | 573,476              | 242            | 0.0011   | -11                   | 19             | -4.7%         | 0.56     | 10                    | 40             | 4.0%          | 0.81     |
| VI. By Categories of Eligibility                                                                                                                                                                                                                                                                                                                                                                                                                                                                                                                                |                      |                |          |                       |                |               |          |                       |                |               |          |
| 17. Eligible for at least one month each year                                                                                                                                                                                                                                                                                                                                                                                                                                                                                                                   | 359,064              | 3,579          | 0.0026   | -201                  | 131            | -5.6%         | 0.12     | -366                  | 250            | -10.2%        | 0.14     |
| 18. Full 36 months eligibility (2008-2010)                                                                                                                                                                                                                                                                                                                                                                                                                                                                                                                      | 304,260              | 3,536          | 0.0022   | -215                  | 149            | -6.1%         | 0.15     | -252                  | 243            | -7.1%         | 0.30     |
| 19. Less than 36 months eligibility (2008-2010)                                                                                                                                                                                                                                                                                                                                                                                                                                                                                                                 | 269,216              | 3,294          | 0.0040   | -470                  | 247            | -14.3%        | 0.06     | -707                  | 401            | -21.5%        | 0.08     |
| 20. New Arrivers and Early Departers                                                                                                                                                                                                                                                                                                                                                                                                                                                                                                                            | 214,412              | 3,165          | 0.0032   | -542                  | 535            | -17.1%        | 0.31     | -375                  | 718            | -11.8%        | 0.60     |
| Notes: Each row is from a different regression. All models are weighted by months of eligibility and propensity scores. Standard errors are clustered for practice IDs. All models include individual fixed effects. In addition, models 5-7 include fixed effects for insurance type and plan type, while the remaining models include fixed effects for insurance type, plan type and payer type. †Clinical categories designated according to the Berenson-Eggers Type of Service (BETOS) classification, version 2012, applied to professional claims only. |                      |                |          |                       |                |               |          |                       |                |               |          |

## **Appendix C. Further Results from the Difference-in-Difference Analysis using Prospective Risk Score for Propensity Weighting**

Table C-1: Treatment Effect Sensitivity Analysis Using Massachusetts Health Quality Project (MHQP) Primary Care Practitioner (PCP) Assignment and Propensity Weighting Using Lagged Prospective Risk Score, with Fixed 2008 PCP Assignment, and Excluding Entry and Exit

Table C-2: Treatment Effect Sensitivity Analysis Using Massachusetts Health Quality Project (MHQP) Primary Care Practitioner (PCP) Assignment and Propensity Weighting Using Lagged Prospective Risk Score, with Fixed PCP Assignment, and Including Entry and Exit

Table C-3: Treatment Effect Sensitivity Analysis Using Massachusetts Health Quality Project (MHQP) Primary Care Practitioner (PCP) Assignment and Propensity Weighting Using Lagged Prospective Risk Score, with Changing PCP Assignment, and Including Entry and Exit

Table C-4: Treatment Effect Sensitivity Analysis Using Capital District Physicians' Health Plan (CDPHP) Primary Care Practitioner (PCP) Assignment and Propensity Weighting Using Lagged Prospective Risk Score, with Fixed 2008 PCP Assignment, and Excluding Entry and Exit

Table C-5: Treatment Effect Sensitivity Analysis Using Capital District Physicians' Health Plan (CDPHP) Primary Care Practitioner (PCP) Assignment and Propensity Weighting Using Lagged Prospective Risk Score, with Fixed PCP Assignment, and Including Entry and Exit

Table C-6: Treatment Effect Sensitivity Analysis Using Capital District Physicians' Health Plan (CDPHP) Primary Care Practitioner (PCP) Assignment and Propensity Weighting Using Lagged Prospective Risk Score, with Changing PCP Assignment, and Including Entry and Exit

Table C-7: Treatment Effect Sensitivity Analysis Using Massachusetts Health Quality Project (MHQP) Primary Care Practitioner (PCP) Assignment and Propensity Weighting—Fixed at 2008—Using Lagged Prospective Risk Score, with Fixed 2008 PCP Assignment, and Excluding Entry and Exit

**Table C-1: Treatment Effect Sensitivity Analysis Using Massachusetts Health Quality Project (MHQP) Primary Care Practitioner (PCP) Assignment and Propensity Weighting Using Lagged Prospective Risk Score, with Fixed 2008 PCP Assignment, and Excluding Entry and Exit**

| Model Name                                      | No. of Patient Years | Dependent Mean | R-square | Year 1 Effects (2009) |                |               |          | Year 2 Effects (2010) |                |               |          |
|-------------------------------------------------|----------------------|----------------|----------|-----------------------|----------------|---------------|----------|-----------------------|----------------|---------------|----------|
|                                                 |                      |                |          | Coefficient           | Standard Error | % effect 2009 | p-values | Coefficient           | Standard Error | % effect 2010 | p-values |
| I. Models of Total Medical Spending, All Payers |                      |                |          |                       |                |               |          |                       |                |               |          |
| 1. All Controls                                 | 410,334              | 3,235          | 0.0026   | -286                  | 154            | -8.8%         | 0.06     | -318                  | 198            | -9.8%         | 0.11     |
| 2. Basic Difference-in-Difference               | 410,334              | 3,235          | 0.0023   | -286                  | 151            | -8.8%         | 0.06     | -327                  | 201            | -10.1%        | 0.10     |
| II. By Physician Specialty                      |                      |                |          |                       |                |               |          |                       |                |               |          |
| 3. Primary Care Specialties Only                | 380,320              | 3,304          | 0.0026   | -274                  | 155            | -8.3%         | 0.08     | -301                  | 198            | -9.1%         | 0.13     |
| 4. Non-Pediatric Primary Care Specialties       | 263,132              | 3,398          | 0.0028   | -328                  | 160            | -9.7%         | 0.04     | -384                  | 211            | -11.3%        | 0.07     |
| III. By Payer                                   |                      |                |          |                       |                |               |          |                       |                |               |          |
| 5. Medicare Only                                | 47,660               | 5,865          | 0.0057   | -700                  | 381            | -11.9%        | 0.07     | -533                  | 382            | -9.1%         | 0.16     |
| 6. Medicaid Only                                | 40,074               | 1,645          | 0.0017   | -223                  | 190            | -13.6%        | 0.24     | 10                    | 298            | 0.6%          | 0.97     |
| 7. Privately Insured Only                       | 322,600              | 2,943          | 0.0022   | -233                  | 138            | -7.9%         | 0.09     | -302                  | 197            | -10.3%        | 0.13     |
| IV. By Place of Service                         |                      |                |          |                       |                |               |          |                       |                |               |          |
| 8. Inpatient Care                               | 410,334              | 838            | 0.0007   | -135                  | 60             | -16.0%        | 0.03     | -157                  | 86             | -18.8%        | 0.07     |
| 9. Emergency Care                               | 410,334              | 89             | 0.0003   | -11                   | 4              | -12.3%        | 0.00     | -7                    | 5              | -7.5%         | 0.22     |
| 10. Outpatient Care, and Other Care             | 410,334              | 2,280          | 0.0044   | -140                  | 95             | -6.2%         | 0.14     | -144                  | 113            | -6.3%         | 0.20     |
| V. By Type of Service†                          |                      |                |          |                       |                |               |          |                       |                |               |          |
| 11. Evaluation & Management                     | 410,334              | 687            | 0.0127   | -32                   | 7              | -4.7%         | 0.00     | -50                   | 9              | -7.3%         | 0.00     |
| 12. Procedures                                  | 410,334              | 800            | 0.0008   | -72                   | 40             | -9.0%         | 0.07     | -67                   | 49             | -8.4%         | 0.18     |
| 13. Imaging                                     | 410,334              | 364            | 0.0005   | -25                   | 11             | -6.9%         | 0.02     | -20                   | 12             | -5.6%         | 0.09     |
| 14. Tests                                       | 410,334              | 168            | 0.0008   | -14                   | 10             | -8.6%         | 0.15     | -27                   | 12             | -16.0%        | 0.03     |
| 15. Durable Medical Equipment                   | 410,334              | 105            | 0.0002   | -6                    | 8              | -5.7%         | 0.47     | -1                    | 32             | -1.4%         | 0.96     |
| 16. Others                                      | 410,334              | 207            | 0.0015   | -26                   | 17             | -12.5%        | 0.12     | 5                     | 37             | 2.3%          | 0.90     |

Notes: Each row is from a different regression. All models are weighted by months of eligibility and propensity scores. Standard errors are clustered for practice IDs. All models include individual fixed effects. In addition, models 5-7 include fixed effects for insurance type and plan type, while the remaining models include fixed effects for insurance type, plan type and payer type. †Clinical categories designated according to the Berenson-Eggers Type of Service (BETOS) classification, version 2012, applied to professional claims only.

**Table C-2: Treatment Effect Sensitivity Analysis Using Massachusetts Health Quality Project (MHQP) Primary Care Practitioner (PCP) Assignment and Propensity Weighting Using Lagged Prospective Risk Score, with Fixed PCP Assignment, and Including Entry and Exit**

| Model Name                                      | No. of Patient Years | Dependent Mean | R-square | Year 1 Effects (2009) |                |               |          | Year 2 Effects (2010) |                |               |          |
|-------------------------------------------------|----------------------|----------------|----------|-----------------------|----------------|---------------|----------|-----------------------|----------------|---------------|----------|
|                                                 |                      |                |          | Coefficient           | Standard Error | % effect 2009 | p-values | Coefficient           | Standard Error | % effect 2010 | p-values |
| I. Models of Total Medical Spending, All Payers |                      |                |          |                       |                |               |          |                       |                |               |          |
| 1. All Controls                                 | 692,270              | 3,211          | 0.0029   | -239                  | 178            | -7.5%         | 0.18     | -286                  | 217            | -8.9%         | 0.19     |
| 2. Basic Difference-in-Difference               | 692,270              | 3,211          | 0.0028   | -238                  | 172            | -7.4%         | 0.17     | -290                  | 218            | -9.0%         | 0.18     |
| II. By Physician Specialty                      |                      |                |          |                       |                |               |          |                       |                |               |          |
| 3. Primary Care Specialties Only                | 623,836              | 3,292          | 0.0030   | -235                  | 181            | -7.1%         | 0.20     | -271                  | 224            | -8.2%         | 0.23     |
| 4. Non-Pediatric Primary Care Specialties       | 424,451              | 3,395          | 0.0033   | -303                  | 193            | -8.9%         | 0.12     | -375                  | 242            | -11.0%        | 0.12     |
| III. By Payer                                   |                      |                |          |                       |                |               |          |                       |                |               |          |
| 5. Medicare Only                                | 58,961               | 6,923          | 0.0101   | -911                  | 422            | -13.2%        | 0.03     | -809                  | 564            | -11.7%        | 0.15     |
| 6. Medicaid Only                                | 136,588              | 1,971          | 0.0013   | -103                  | 349            | -5.2%         | 0.77     | -65                   | 302            | -3.3%         | 0.83     |
| 7. Privately Insured Only                       | 496,721              | 2,909          | 0.0024   | -173                  | 155            | -6.0%         | 0.26     | -235                  | 206            | -8.1%         | 0.25     |
| IV. By Place of Service                         |                      |                |          |                       |                |               |          |                       |                |               |          |
| 8. Inpatient Care                               | 692,270              | 920            | 0.0011   | -150                  | 93             | -16.3%        | 0.11     | -145                  | 114            | -15.7%        | 0.20     |
| 9. Emergency Care                               | 692,270              | 100            | 0.0002   | -13                   | 4              | -13.4%        | 0.00     | -5                    | 6              | -4.5%         | 0.43     |
| 10. Outpatient Care, and Other Care             | 692,270              | 2,156          | 0.0041   | -74                   | 105            | -3.5%         | 0.48     | -116                  | 109            | -5.4%         | 0.29     |
| V. By Type of Service†                          |                      |                |          |                       |                |               |          |                       |                |               |          |
| 11. Evaluation & Management                     | 692,270              | 652            | 0.0113   | -34                   | 7              | -5.2%         | 0.00     | -49                   | 8              | -7.6%         | 0.00     |
| 12. Procedures                                  | 692,270              | 753            | 0.0008   | -42                   | 46             | -5.6%         | 0.36     | -59                   | 52             | -7.8%         | 0.26     |
| 13. Imaging                                     | 692,270              | 340            | 0.0006   | -25                   | 9              | -7.5%         | 0.00     | -19                   | 14             | -5.6%         | 0.17     |
| 14. Tests                                       | 692,270              | 158            | 0.0008   | -10                   | 13             | -6.3%         | 0.43     | -18                   | 14             | -11.3%        | 0.20     |
| 15. Durable Medical Equipment                   | 692,270              | 98             | 0.0002   | -4                    | 9              | -4.2%         | 0.65     | 3                     | 24             | 3.2%          | 0.89     |
| 16. Others                                      | 692,270              | 212            | 0.0012   | 3                     | 27             | 1.3%          | 0.92     | 4                     | 41             | 2.0%          | 0.92     |
| VI. By Categories of Eligibility                |                      |                |          |                       |                |               |          |                       |                |               |          |
| 17. Eligible for at least one month each year   | 503,265              | 3,273          | 0.0030   | -205                  | 131            | -6.3%         | 0.12     | -262                  | 198            | -8.0%         | 0.19     |
| 18. Full 36 months eligibility (2008-2010)      | 410,334              | 3,245          | 0.0025   | -266                  | 155            | -8.2%         | 0.09     | -303                  | 198            | -9.3%         | 0.13     |
| 19. Less than 36 months eligibility (2008-2010) | 281,936              | 3,140          | 0.0058   | -153                  | 367            | -4.9%         | 0.68     | -201                  | 458            | -6.4%         | 0.66     |
| 20. New Arrivers and Early Departers            | 189,005              | 3,003          | 0.0046   | -417                  | 528            | -13.9%        | 0.43     | -539                  | 421            | -17.9%        | 0.20     |

Notes: Each row is from a different regression. All models are weighted by months of eligibility and propensity scores. Standard errors are clustered for practice IDs. All models include individual fixed effects. In addition, models 5-7 include fixed effects for insurance type and plan type, while the remaining models include fixed effects for insurance type, plan type and payer type. †Clinical categories designated according to the Berenson-Eggers Type of Service (BETOS) classification, version 2012, applied to professional claims only.

**Table C-3: Treatment Effect Sensitivity Analysis Using Massachusetts Health Quality Project (MHQP) Primary Care Practitioner (PCP) Assignment and Propensity Weighting Using Lagged Prospective Risk Score, with Changing PCP Assignment, and Including Entry and Exit**

| Model Name                                      | No. of Patient Years | Dependent Mean | R-square | Year 1 Effects (2009) |                |               |          | Year 2 Effects (2010) |                |               |          |
|-------------------------------------------------|----------------------|----------------|----------|-----------------------|----------------|---------------|----------|-----------------------|----------------|---------------|----------|
|                                                 |                      |                |          | Coefficient           | Standard Error | % effect 2009 | p-values | Coefficient           | Standard Error | % effect 2010 | p-values |
| I. Models of Total Medical Spending, All Payers |                      |                |          |                       |                |               |          |                       |                |               |          |
| 1. All Controls                                 | 692,270              | 3,200          | 0.0031   | -211                  | 181            | -6.6%         | 0.24     | -251                  | 252            | -7.9%         | 0.32     |
| 2. Basic Difference-in-Difference               | 692,270              | 3,200          | 0.0030   | -209                  | 174            | -6.5%         | 0.23     | -252                  | 253            | -7.9%         | 0.32     |
| II. By Physician Specialty                      |                      |                |          |                       |                |               |          |                       |                |               |          |
| 3. Primary Care Specialties Only                | 623,836              | 3,261          | 0.0031   | -227                  | 184            | -7.0%         | 0.22     | -278                  | 257            | -8.5%         | 0.28     |
| 4. Non-Pediatric Primary Care Specialties       | 424,451              | 3,387          | 0.0034   | -294                  | 194            | -8.7%         | 0.13     | -357                  | 275            | -10.6%        | 0.19     |
| III. By Payer                                   |                      |                |          |                       |                |               |          |                       |                |               |          |
| 5. Medicare Only                                | 58,961               | 6,911          | 0.0100   | -1027                 | 563            | -14.9%        | 0.07     | -674                  | 593            | -9.8%         | 0.26     |
| 6. Medicaid Only                                | 136,588              | 1,983          | 0.0014   | 51                    | 328            | 2.6%          | 0.88     | 20                    | 267            | 1.0%          | 0.94     |
| 7. Privately Insured Only                       | 496,721              | 2,898          | 0.0025   | -143                  | 150            | -5.0%         | 0.34     | -230                  | 235            | -7.9%         | 0.33     |
| IV. By Place of Service                         |                      |                |          |                       |                |               |          |                       |                |               |          |
| 8. Inpatient Care                               | 692,270              | 913            | 0.0011   | -149                  | 78             | -16.3%        | 0.05     | -158                  | 132            | -17.3%        | 0.23     |
| 9. Emergency Care                               | 692,270              | 99             | 0.0002   | -10                   | 4              | -9.9%         | 0.01     | -3                    | 6              | -3.3%         | 0.59     |
| 10. Outpatient Care, and Other Care             | 692,270              | 2,153          | 0.0043   | -48                   | 114            | -2.2%         | 0.67     | -73                   | 123            | -3.4%         | 0.55     |
| V. By Type of Service†                          |                      |                |          |                       |                |               |          |                       |                |               |          |
| 11. Evaluation & Management                     | 692,270              | 651            | 0.0116   | -28                   | 7              | -4.3%         | 0.00     | -46                   | 7              | -7.1%         | 0.00     |
| 12. Procedures                                  | 692,270              | 755            | 0.0009   | -22                   | 47             | -3.0%         | 0.63     | -35                   | 61             | -4.7%         | 0.56     |
| 13. Imaging                                     | 692,270              | 338            | 0.0006   | -20                   | 10             | -5.8%         | 0.06     | -15                   | 16             | -4.5%         | 0.35     |
| 14. Tests                                       | 692,270              | 158            | 0.0009   | -7                    | 13             | -4.7%         | 0.57     | -21                   | 15             | -13.5%        | 0.16     |
| 15. Durable Medical Equipment                   | 692,270              | 96             | 0.0002   | -3                    | 9              | -3.2%         | 0.74     | -1                    | 25             | -0.6%         | 0.98     |
| 16. Others                                      | 692,270              | 213            | 0.0012   | 10                    | 29             | 4.9%          | 0.73     | 14                    | 46             | 6.7%          | 0.76     |
| VI. By Categories of Eligibility                |                      |                |          |                       |                |               |          |                       |                |               |          |
| 17. Eligible for at least one month each year   | 503,265              | 3,244          | 0.0030   | -181                  | 130            | -5.6%         | 0.16     | -226                  | 235            | -7.0%         | 0.34     |
| 18. Full 36 months eligibility (2008-2010)      | 410,334              | 3,222          | 0.0025   | -251                  | 158            | -7.8%         | 0.11     | -263                  | 225            | -8.2%         | 0.24     |
| 19. Less than 36 months eligibility (2008-2010) | 281,936              | 3,153          | 0.0063   | -42                   | 333            | -1.3%         | 0.90     | -109                  | 424            | -3.4%         | 0.80     |
| 20. New Arrivers and Early Departers            | 189,005              | 3,049          | 0.0055   | -342                  | 534            | -11.2%        | 0.52     | -518                  | 436            | -17.0%        | 0.24     |

Notes: Each row is from a different regression. All models are weighted by months of eligibility and propensity scores. Standard errors are clustered for practice IDs. All models include individual fixed effects. In addition, models 5-7 include fixed effects for insurance type and plan type, while the remaining models include fixed effects for insurance type, plan type and payer type. †Clinical categories designated according to the Berenson-Eggers Type of Service (BETOS) classification, version 2012, applied to professional claims only.

**Table C-4: Treatment Effect Sensitivity Analysis Using Capital District Physicians' Health Plan (CDPHP) Primary Care Practitioner (PCP) Assignment and Propensity Weighting Using Lagged Prospective Risk Score, with Fixed 2008 PCP Assignment, and Excluding Entry and Exit**

| Model Name                                      | No. of Patient Years | Dependent Mean | R-square | Year 1 Effects (2009) |                |               |          | Year 2 Effects (2010) |                |               |          |
|-------------------------------------------------|----------------------|----------------|----------|-----------------------|----------------|---------------|----------|-----------------------|----------------|---------------|----------|
|                                                 |                      |                |          | Coefficient           | Standard Error | % effect 2009 | p-values | Coefficient           | Standard Error | % effect 2010 | p-values |
| I. Models of Total Medical Spending, All Payers |                      |                |          |                       |                |               |          |                       |                |               |          |
| 1. All Controls                                 | 304,260              | 3,422          | 0.0033   | -197                  | 175            | -5.7%         | 0.26     | -195                  | 236            | -5.7%         | 0.41     |
| 2. Basic Difference-in-Difference               | 304,260              | 3,422          | 0.0030   | -197                  | 172            | -5.8%         | 0.25     | -203                  | 238            | -5.9%         | 0.39     |
| II. By Physician Specialty                      |                      |                |          |                       |                |               |          |                       |                |               |          |
| 3. Primary Care Specialties Only                | 294,562              | 3,377          | 0.0030   | -211                  | 177            | -6.3%         | 0.23     | -194                  | 238            | -5.7%         | 0.42     |
| 4. Non-Pediatric Primary Care Specialties       | 200,072              | 3,474          | 0.0033   | -284                  | 184            | -8.2%         | 0.12     | -266                  | 251            | -7.6%         | 0.29     |
| III. By Payer                                   |                      |                |          |                       |                |               |          |                       |                |               |          |
| 5. Medicare Only                                | 40,545               | 6,009          | 0.0068   | -531                  | 427            | -8.8%         | 0.21     | -447                  | 321            | -7.4%         | 0.16     |
| 6. Medicaid Only                                | 29,011               | 1,811          | 0.0034   | -293                  | 156            | -16.2%        | 0.06     | 29                    | 339            | 1.6%          | 0.93     |
| 7. Privately Insured Only                       | 234,704              | 3,076          | 0.0030   | -136                  | 179            | -4.4%         | 0.45     | -156                  | 260            | -5.1%         | 0.55     |
| IV. By Place of Service                         |                      |                |          |                       |                |               |          |                       |                |               |          |
| 8. Inpatient Care                               | 304,260              | 845            | 0.0010   | -100                  | 70             | -11.9%        | 0.16     | -161                  | 93             | -19.1%        | 0.08     |
| 9. Emergency Care                               | 304,260              | 92             | 0.0005   | -11                   | 5              | -12.1%        | 0.02     | 0                     | 6              | -0.1%         | 0.99     |
| 10. Outpatient Care, and Other Care             | 304,260              | 2,457          | 0.0054   | -89                   | 113            | -3.6%         | 0.43     | -41                   | 140            | -1.7%         | 0.77     |
| V. By Type of Service†                          |                      |                |          |                       |                |               |          |                       |                |               |          |
| 11. Evaluation & Management                     | 304,260              | 747            | 0.0147   | -21                   | 12             | -2.9%         | 0.09     | -38                   | 8              | -5.1%         | 0.00     |
| 12. Procedures                                  | 304,260              | 852            | 0.0014   | -27                   | 47             | -3.2%         | 0.56     | -2                    | 57             | -0.2%         | 0.98     |
| 13. Imaging                                     | 304,260              | 391            | 0.0007   | -19                   | 15             | -4.9%         | 0.20     | -5                    | 19             | -1.2%         | 0.80     |
| 14. Tests                                       | 304,260              | 185            | 0.0008   | -9                    | 13             | -4.9%         | 0.47     | -20                   | 16             | -10.7%        | 0.23     |
| 15. Durable Medical Equipment                   | 304,260              | 113            | 0.0002   | -10                   | 17             | -9.2%         | 0.55     | -8                    | 34             | -7.1%         | 0.81     |
| 16. Others                                      | 304,260              | 213            | 0.0020   | -17                   | 18             | -8.0%         | 0.34     | 33                    | 41             | 15.4%         | 0.42     |

Notes: Each row is from a different regression. All models are weighted by months of eligibility and propensity scores. Standard errors are clustered for practice IDs. All models include individual fixed effects. In addition, models 5-7 include fixed effects for insurance type and plan type, while the remaining models include fixed effects for insurance type, plan type and payer type. †Clinical categories designated according to the Berenson-Eggers Type of Service (BETOS) classification, version 2012, applied to professional claims only.

**Table C-5: Treatment Effect Sensitivity Analysis Using Capital District Physicians' Health Plan (CDPHP) Primary Care Practitioner (PCP) Assignment and Propensity Weighting Using Lagged Prospective Risk Score, with Fixed PCP Assignment, and Including Entry and Exit**

| Model Name                                      | No. of Patient Years | Dependent Mean | R-square | Year 1 Effects (2009) |                |               |          | Year 2 Effects (2010) |                |               |          |
|-------------------------------------------------|----------------------|----------------|----------|-----------------------|----------------|---------------|----------|-----------------------|----------------|---------------|----------|
|                                                 |                      |                |          | Coefficient           | Standard Error | % effect 2009 | p-values | Coefficient           | Standard Error | % effect 2010 | p-values |
| I. Models of Total Medical Spending, All Payers |                      |                |          |                       |                |               |          |                       |                |               |          |
| 1. All Controls                                 | 573,476              | 3,261          | 0.0035   | -164                  | 189            | -5.0%         | 0.39     | -186                  | 273            | -5.7%         | 0.49     |
| 2. Basic Difference-in-Difference               | 573,476              | 3,261          | 0.0033   | -163                  | 177            | -5.0%         | 0.36     | -189                  | 266            | -5.8%         | 0.48     |
| II. By Physician Specialty                      |                      |                |          |                       |                |               |          |                       |                |               |          |
| 3. Primary Care Specialties Only                | 549,373              | 3,204          | 0.0032   | -169                  | 190            | -5.3%         | 0.37     | -177                  | 272            | -5.5%         | 0.51     |
| 4. Non-Pediatric Primary Care Specialties       | 372,093              | 3,298          | 0.0035   | -256                  | 201            | -7.8%         | 0.20     | -276                  | 291            | -8.4%         | 0.34     |
| III. By Payer                                   |                      |                |          |                       |                |               |          |                       |                |               |          |
| 5. Medicare Only                                | 54,306               | 6,819          | 0.0103   | -1179                 | 410            | -17.3%        | 0.00     | -1006                 | 551            | -14.8%        | 0.07     |
| 6. Medicaid Only                                | 107,408              | 2,045          | 0.0017   | -230                  | 232            | -11.3%        | 0.32     | -270                  | 376            | -13.2%        | 0.46     |
| 7. Privately Insured Only                       | 411,762              | 2,946          | 0.0029   | -28                   | 197            | -1.0%         | 0.89     | -62                   | 317            | -2.1%         | 0.84     |
| IV. By Place of Service                         |                      |                |          |                       |                |               |          |                       |                |               |          |
| 8. Inpatient Care                               | 573,476              | 886            | 0.0012   | -120                  | 85             | -13.6%        | 0.16     | -120                  | 137            | -13.5%        | 0.37     |
| 9. Emergency Care                               | 573,476              | 100            | 0.0004   | -12                   | 5              | -11.7%        | 0.01     | 1                     | 143            | 0.9%          | 0.87     |
| 10. Outpatient Care, and Other Care             | 573,476              | 2,245          | 0.0049   | -30                   | 112            | -1.3%         | 0.79     | -52                   | 6              | -2.3%         | 0.71     |
| V. By Type of Service†                          |                      |                |          |                       |                |               |          |                       |                |               |          |
| 11. Evaluation & Management                     | 573,476              | 687            | 0.0128   | -21                   | 10             | -3.0%         | 0.05     | -38                   | 8              | -5.5%         | 0.00     |
| 12. Procedures                                  | 573,476              | 775            | 0.0012   | -7                    | 54             | -0.9%         | 0.90     | -25                   | 64             | -3.3%         | 0.69     |
| 13. Imaging                                     | 573,476              | 355            | 0.0006   | -19                   | 13             | -5.4%         | 0.13     | -12                   | 19             | -3.5%         | 0.51     |
| 14. Tests                                       | 573,476              | 167            | 0.0011   | -4                    | 15             | -2.7%         | 0.76     | -17                   | 18             | -10.0%        | 0.36     |
| 15. Durable Medical Equipment                   | 573,476              | 99             | 0.0002   | -9                    | 11             | -9.1%         | 0.40     | -6                    | 27             | -6.5%         | 0.81     |
| 16. Others                                      | 573,476              | 208            | 0.0017   | 8                     | 20             | 3.7%          | 0.69     | 37                    | 39             | 17.6%         | 0.32     |
| VI. By Categories of Eligibility                |                      |                |          |                       |                |               |          |                       |                |               |          |
| 17. Eligible for at least one month each year   | 359,064              | 3,450          | 0.0037   | -120                  | 165            | -3.5%         | 0.47     | -156                  | 244            | -4.5%         | 0.52     |
| 18. Full 36 months eligibility (2008-2010)      | 304,260              | 3,404          | 0.0032   | -168                  | 175            | -4.9%         | 0.34     | -173                  | 237            | -5.1%         | 0.46     |
| 19. Less than 36 months eligibility (2008-2010) | 269,216              | 3,058          | 0.0048   | -155                  | 215            | -5.1%         | 0.47     | -218                  | 427            | -7.1%         | 0.59     |
| 20. New Arrivers and Early Departers            | 214,412              | 2,905          | 0.0037   | -321                  | 506            | -11.1%        | 0.53     | -328                  | 647            | -11.3%        | 0.61     |

Notes: Each row is from a different regression. All models are weighted by months of eligibility and propensity scores. Standard errors are clustered for practice IDs. All models include individual fixed effects. In addition, models 5-7 include fixed effects for insurance type and plan type, while the remaining models include fixed effects for insurance type, plan type and payer type. †Clinical categories designated according to the Berenson-Eggers Type of Service (BETOS) classification, version 2012, applied to professional claims only.

**Table C-6: Treatment Effect Sensitivity Analysis Using Capital District Physicians' Health Plan (CDPHP) Primary Care Practitioner (PCP) Assignment and Propensity Weighting Using Lagged Prospective Risk Score, with Changing PCP Assignment, and Including Entry and Exit**

| Model Name                                      | No. of Patient Years | Dependent Mean | R-square | Year 1 Effects (2009) |                |               |          | Year 2 Effects (2010) |                |               |          |
|-------------------------------------------------|----------------------|----------------|----------|-----------------------|----------------|---------------|----------|-----------------------|----------------|---------------|----------|
|                                                 |                      |                |          | Coefficient           | Standard Error | % effect 2009 | p-values | Coefficient           | Standard Error | % effect 2010 | p-values |
| I. Models of Total Medical Spending, All Payers |                      |                |          |                       |                |               |          |                       |                |               |          |
| 1. All Controls                                 | 573,476              | 3,188          | 0.0032   | -322                  | 171            | -10.1%        | 0.05     | -332                  | 278            | -10.4%        | 0.23     |
| 2. Basic Difference-in-Difference               | 573,476              | 3,188          | 0.0031   | -321                  | 161            | -10.1%        | 0.04     | -330                  | 273            | -10.4%        | 0.23     |
| II. By Physician Specialty                      |                      |                |          |                       |                |               |          |                       |                |               |          |
| 3. Primary Care Specialties Only                | 549,373              | 3,152          | 0.0030   | -306                  | 171            | -9.7%         | 0.07     | -271                  | 275            | -8.6%         | 0.32     |
| 4. Non-Pediatric Primary Care Specialties       | 372,093              | 3,275          | 0.0032   | -373                  | 181            | -11.4%        | 0.03     | -370                  | 294            | -11.3%        | 0.21     |
| III. By Payer                                   |                      |                |          |                       |                |               |          |                       |                |               |          |
| 5. Medicare Only                                | 54,306               | 6,610          | 0.0097   | -1640                 | 440            | -24.8%        | 0.00     | -1237                 | 667            | -18.7%        | 0.06     |
| 6. Medicaid Only                                | 107,408              | 2,011          | 0.0017   | -259                  | 271            | -12.9%        | 0.32     | -623                  | 310            | -31.0%        | 0.04     |
| 7. Privately Insured Only                       | 411,762              | 2,895          | 0.0027   | -166                  | 164            | -5.7%         | 0.30     | -189                  | 330            | -6.5%         | 0.57     |
| IV. By Place of Service                         |                      |                |          |                       |                |               |          |                       |                |               |          |
| 8. Inpatient Care                               | 573,476              | 852            | 0.0010   | -205                  | 69             | -24.1%        | 0.00     | -220                  | 124            | -25.9%        | 0.08     |
| 9. Emergency Care                               | 573,476              | 98             | 0.0004   | -11                   | 108            | -11.2%        | 0.02     | -1                    | 5              | -0.7%         | 0.91     |
| 10. Outpatient Care, and Other Care             | 573,476              | 2,212          | 0.0046   | -97                   | 5              | -4.4%         | 0.37     | -95                   | 157            | -4.3%         | 0.54     |
| V. By Type of Service†                          |                      |                |          |                       |                |               |          |                       |                |               |          |
| 11. Evaluation & Management                     | 573,476              | 679            | 0.0129   | -29                   | 9              | -4.2%         | 0.00     | -48                   | 7              | -7.0%         | 0.00     |
| 12. Procedures                                  | 573,476              | 765            | 0.0012   | -27                   | 55             | -3.6%         | 0.61     | -31                   | 73             | -4.0%         | 0.67     |
| 13. Imaging                                     | 573,476              | 349            | 0.0006   | -25                   | 10             | -7.2%         | 0.01     | -18                   | 21             | -5.1%         | 0.41     |
| 14. Tests                                       | 573,476              | 165            | 0.0010   | -9                    | 13             | -5.6%         | 0.47     | -21                   | 19             | -12.5%        | 0.28     |
| 15. Durable Medical Equipment                   | 573,476              | 96             | 0.0002   | -19                   | 9              | -19.7%        | 0.04     | -15                   | 28             | -16.0%        | 0.58     |
| 16. Others                                      | 573,476              | 203            | 0.0015   | -14                   | 19             | -6.7%         | 0.44     | 19                    | 39             | 9.6%          | 0.62     |
| VI. By Categories of Eligibility                |                      |                |          |                       |                |               |          |                       |                |               |          |
| 17. Eligible for at least one month each year   | 359,064              | 3,352          | 0.0033   | -305                  | 131            | -9.1%         | 0.02     | -325                  | 248            | -9.7%         | 0.19     |
| 18. Full 36 months eligibility (2008-2010)      | 304,260              | 3,333          | 0.0028   | -326                  | 149            | -9.8%         | 0.03     | -291                  | 241            | -8.7%         | 0.23     |
| 19. Less than 36 months eligibility (2008-2010) | 269,216              | 2,982          | 0.0046   | -313                  | 247            | -10.5%        | 0.17     | -432                  | 360            | -14.5%        | 0.23     |
| 20. New Arrivers and Early Departers            | 214,412              | 2,881          | 0.0037   | -371                  | 535            | -12.9%        | 0.48     | -358                  | 711            | -12.4%        | 0.61     |

Notes: Each row is from a different regression. All models are weighted by months of eligibility and propensity scores. Standard errors are clustered for practice IDs. All models include individual fixed effects. In addition, models 5-7 include fixed effects for insurance type and plan type, while the remaining models include fixed effects for insurance type, plan type and payer type. †Clinical categories designated according to the Berenson-Eggers Type of Service (BETOS) classification, version 2012, applied to professional claims only.

**Table C-7: Treatment Effect Sensitivity Analysis Using Massachusetts Health Quality Project (MHQP) Primary Care Practitioner (PCP) Assignment and Propensity Weighting—Fixed at 2008—Using Lagged Prospective Risk Score, with Fixed 2008 PCP Assignment, and Excluding Entry and Exit**

| Model Name                                      | No. of Patient Years | Dependent Mean | R-square | Year 1 Effects (2009) |                |               |          | Year 2 Effects (2010) |                |               |          |
|-------------------------------------------------|----------------------|----------------|----------|-----------------------|----------------|---------------|----------|-----------------------|----------------|---------------|----------|
|                                                 |                      |                |          | Coefficient           | Standard Error | % effect 2009 | p-values | Coefficient           | Standard Error | % effect 2010 | p-values |
| I. Models of Total Medical Spending, All Payers |                      |                |          |                       |                |               |          |                       |                |               |          |
| 1. All Controls                                 | 410,334              | 3,283          | 0.0021   | -192                  | 156            | -5.9%         | 0.22     | -247                  | 198            | -7.5%         | 0.21     |
| 2. Basic Difference-in-Difference               | 410,334              | 3,283          | 0.0018   | -193                  | 152            | -5.9%         | 0.20     | -258                  | 199            | -7.9%         | 0.20     |
| II. By Physician Specialty                      |                      |                |          |                       |                |               |          |                       |                |               |          |
| 3. Primary Care Specialties Only                | 380,320              | 3,351          | 0.0022   | -176                  | 156            | -5.3%         | 0.26     | -227                  | 197            | -6.8%         | 0.25     |
| 4. Non-Pediatric Primary Care Specialties       | 263,132              | 3,439          | 0.0024   | -240                  | 162            | -7.0%         | 0.14     | -306                  | 210            | -8.9%         | 0.15     |
| III. By Payer                                   |                      |                |          |                       |                |               |          |                       |                |               |          |
| 5. Medicare Only                                | 47,660               | 5,956          | 0.0046   | -474                  | 385            | -8.0%         | 0.22     | -301                  | 387            | -5.1%         | 0.44     |
| 6. Medicaid Only                                | 40,074               | 1,683          | 0.0014   | -189                  | 196            | -11.2%        | 0.33     | 48                    | 297            | 2.9%          | 0.87     |
| 7. Privately Insured Only                       | 322,600              | 2,981          | 0.0019   | -154                  | 140            | -5.2%         | 0.27     | -256                  | 194            | -8.6%         | 0.19     |
| IV. By Place of Service                         |                      |                |          |                       |                |               |          |                       |                |               |          |
| 8. Inpatient Care                               | 410,334              | 857            | 0.0005   | -55                   | 63             | -6.4%         | 0.38     | -81                   | 87             | -9.5%         | 0.35     |
| 9. Emergency Care                               | 410,334              | 89             | 0.0003   | -9                    | 4              | -10.5%        | 0.01     | -6                    | 5              | -6.3%         | 0.30     |
| 10. Outpatient Care, and Other Care             | 410,334              | 2,307          | 0.0041   | -130                  | 96             | -5.6%         | 0.17     | -153                  | 112            | -6.6%         | 0.17     |
| V. By Type of Service†                          |                      |                |          |                       |                |               |          |                       |                |               |          |
| 11. Evaluation & Management                     | 410,334              | 690            | 0.0108   | -24                   | 8              | -3.5%         | 0.00     | -43                   | 9              | -6.2%         | 0.00     |
| 12. Procedures                                  | 410,334              | 811            | 0.0007   | -65                   | 40             | -8.1%         | 0.10     | -69                   | 49             | -8.5%         | 0.16     |
| 13. Imaging                                     | 410,334              | 367            | 0.0004   | -21                   | 11             | -5.6%         | 0.06     | -16                   | 12             | -4.5%         | 0.17     |
| 14. Tests                                       | 410,334              | 170            | 0.0007   | -14                   | 10             | -8.0%         | 0.17     | -26                   | 12             | -15.2%        | 0.04     |
| 15. Durable Medical Equipment                   | 410,334              | 107            | 0.0002   | -6                    | 8              | -5.5%         | 0.49     | -1                    | 31             | -0.5%         | 0.99     |
| 16. Others                                      | 410,334              | 216            | 0.0014   | -26                   | 17             | -12.1%        | 0.13     | -2                    | 37             | -1.0%         | 0.95     |

Notes: Each row is from a different regression. All models are weighted by months of eligibility and propensity scores. Standard errors are clustered for practice IDs. All models include individual fixed effects. In addition, models 5-7 include fixed effects for insurance type and plan type, while the remaining models include fixed effects for insurance type, plan type and payer type. †Clinical categories designated according to the Berenson-Eggers Type of Service (BETOS) classification, version 2012, applied to professional claims only.
